# Supplementary material for: Convergence, plasticity, and tissue residence of regulatory T cell response via TCR repertoire prism
Source: bioRxiv preprint, doi:10.1101/2023.06.15.544726, version 4 (2023-10-23)
Supplement: Supplementary Table 2 [file 544726_file03.xlsx]

## Sheet: metadata
file_name	sample_id	cell_type	organ	challenge	cancer	site of challenge	TOTAL_READS	Functional clonotypes	Functional UMI	observedDiversity_mean_n1000	chao1_mean_n1000	normalizedShannonWienerIndex_mean_n1000
Axln_ECD4-B16-1-Lungtumor_S24.txt	Axln_ECD4-B16-1-Lungtumor_S24	ECD4	AXLN	B16	LUNGTUMOR	LUNG	678839	4288	24897	549	1899	0.93103
Axln_ECD4-B16-1-Skintumor_S9.txt	Axln_ECD4-B16-1-Skintumor_S9	ECD4	AXLN	B16	SKINTUMOR	SKIN	62693	1617	7220	432	1597	0.844301
Axln_ECD4-B16-2-Lungtumor_S25.txt	Axln_ECD4-B16-2-Lungtumor_S25	ECD4	AXLN	B16	LUNGTUMOR	LUNG	139629	3951	24173	493	1714	0.909429
Axln_ECD4-B16-2-Skintumor_S10.txt	Axln_ECD4-B16-2-Skintumor_S10	ECD4	AXLN	B16	SKINTUMOR	SKIN	56597	1593	4491	524	2072	0.882059
Axln_ECD4-B16-3-Lungtumor_S26.txt	Axln_ECD4-B16-3-Lungtumor_S26	ECD4	AXLN	B16	LUNGTUMOR	LUNG	611484	6343	54618	442	1296	0.864592
Axln_ECD4-B16-3-Skintumor_S11.txt	Axln_ECD4-B16-3-Skintumor_S11	ECD4	AXLN	B16	SKINTUMOR	SKIN	723011	12267	78878	542	2576	0.876962
Axln_ECD4-B16-4-Lungtumor_S27.txt	Axln_ECD4-B16-4-Lungtumor_S27	ECD4	AXLN	B16	LUNGTUMOR	LUNG	369125	4249	23108	537	1968	0.907176
Axln_ECD4-Bleo1_Lung_S31.txt	Axln_ECD4-Bleo1_Lung_S31	ECD4	AXLN	BLEO	NONE	LUNG	528859	1000	4271	429	1169	0.879764
Axln_ECD4-Bleo2_Lung_S32.txt	Axln_ECD4-Bleo2_Lung_S32	ECD4	AXLN	BLEO	NONE	LUNG	372783	1602	5767	489	1675	0.903705
Axln_ECD4-Bleo3_Lung_S33.txt	Axln_ECD4-Bleo3_Lung_S33	ECD4	AXLN	BLEO	NONE	LUNG	189018	704	2347	423	969	0.877119
Axln_ECD4-Bleo4_Lung_S34.txt	Axln_ECD4-Bleo4_Lung_S34	ECD4	AXLN	BLEO	NONE	LUNG	475866	1475	7592	392	1289	0.831253
Axln_ECD4-CTRL1-Axln_S13.txt	Axln_ECD4-CTRL1-Axln_S13	ECD4	AXLN	CTRL	NONE	CONTROL	658445	10996	40790	776	3611	0.977465
Axln_ECD4-CTRL2-Axln_S14.txt	Axln_ECD4-CTRL2-Axln_S14	ECD4	AXLN	CTRL	NONE	CONTROL	479106	4252	12706	741	3395	0.966414
Axln_ECD4-CTRL3-Axln_S15.txt	Axln_ECD4-CTRL3-Axln_S15	ECD4	AXLN	CTRL	NONE	CONTROL	934573	5143	17022	698	2721	0.961193
Axln_ECD4-LLC-1_Lungtumor_S16.txt	Axln_ECD4-LLC-1_Lungtumor_S16	ECD4	AXLN	LLC	LUNGTUMOR	LUNG	100563	2062	8216	537	1671	0.924165
Axln_ECD4-LLC-1_Skintumor_S5.txt	Axln_ECD4-LLC-1_Skintumor_S5	ECD4	AXLN	LLC	SKINTUMOR	SKIN	131616	312	658	excluded	excluded	excluded
Axln_ECD4-LLC-2_Lungtumor_S17.txt	Axln_ECD4-LLC-2_Lungtumor_S17	ECD4	AXLN	LLC	LUNGTUMOR	LUNG	873833	2266	12112	477	1294	0.906994
Axln_ECD4-LLC-2_Skintumor_S6.txt	Axln_ECD4-LLC-2_Skintumor_S6	ECD4	AXLN	LLC	SKINTUMOR	SKIN	938208	1001	8091	271	1110	0.69658
Axln_ECD4-LLC-3_Lungtumor_S18.txt	Axln_ECD4-LLC-3_Lungtumor_S18	ECD4	AXLN	LLC	LUNGTUMOR	LUNG	1010950	2718	16573	498	1741	0.890501
Axln_ECD4-LLC-3_Skintumor_S7.txt	Axln_ECD4-LLC-3_Skintumor_S7	ECD4	AXLN	LLC	SKINTUMOR	SKIN	278681	596	1447	472	1050	0.902428
Axln_ECD4-LLC-4_Lungtumor_S19.txt	Axln_ECD4-LLC-4_Lungtumor_S19	ECD4	AXLN	LLC	LUNGTUMOR	LUNG	30997	1666	3826	595	2759	0.931496
Axln_ECD4-LLC-4_Skintumor_S8.txt	Axln_ECD4-LLC-4_Skintumor_S8	ECD4	AXLN	LLC	SKINTUMOR	SKIN	377106	511	1370	427	947	0.89703
Axln_ECD4-Pymt-1_Lungtumor_S20.txt	Axln_ECD4-Pymt-1_Lungtumor_S20	ECD4	AXLN	PYMT	LUNGTUMOR	LUNG	906089	1876	5546	599	2290	0.929188
Axln_ECD4-Pymt-1_Skintumor_S1.txt	Axln_ECD4-Pymt-1_Skintumor_S1	ECD4	AXLN	PYMT	SKINTUMOR	SKIN	1012656	2495	6234	650	2674	0.94283
Axln_ECD4-Pymt-2_Lungtumor_S21.txt	Axln_ECD4-Pymt-2_Lungtumor_S21	ECD4	AXLN	PYMT	LUNGTUMOR	LUNG	660186	6128	43022	514	1799	0.904061
Axln_ECD4-Pymt-2_Skintumor_S2.txt	Axln_ECD4-Pymt-2_Skintumor_S2	ECD4	AXLN	PYMT	SKINTUMOR	SKIN	1136094	3986	10630	730	3166	0.961365
Axln_ECD4-Pymt-3_Lungtumor_S22.txt	Axln_ECD4-Pymt-3_Lungtumor_S22	ECD4	AXLN	PYMT	LUNGTUMOR	LUNG	728135	5880	28052	619	2563	0.907799
Axln_ECD4-Pymt-3_Skintumor_S3.txt	Axln_ECD4-Pymt-3_Skintumor_S3	ECD4	AXLN	PYMT	SKINTUMOR	SKIN	60400	474	764	474	1013	0.966315
Axln_ECD4-Pymt-4_Lungtumor_S23.txt	Axln_ECD4-Pymt-4_Lungtumor_S23	ECD4	AXLN	PYMT	LUNGTUMOR	LUNG	816694	4031	15219	605	2295	0.931375
Axln_ECD4-Pymt-4_Skintumor_S4.txt	Axln_ECD4-Pymt-4_Skintumor_S4	ECD4	AXLN	PYMT	SKINTUMOR	SKIN	478938	3211	7459	734	2920	0.968842
Axln_ECD4-Worm1_Lung_S28.txt	Axln_ECD4-Worm1_Lung_S28	ECD4	AXLN	WORM	NONE	LUNG	875273	5424	78201	394	1021	0.800496
Axln_ECD4-Worm2_Lung_S29.txt	Axln_ECD4-Worm2_Lung_S29	ECD4	AXLN	WORM	NONE	LUNG	406881	2150	18988	386	985	0.837359
Axln_ECD4-Worm3_Lung_S30.txt	Axln_ECD4-Worm3_Lung_S30	ECD4	AXLN	WORM	NONE	LUNG	600077	5367	66473	418	1153	0.848278
Axln_ETREG_B16-1_Lungtumor_S23.txt	Axln_ETREG_B16-1_Lungtumor_S23	ETREG	AXLN	B16	LUNGTUMOR	LUNG	131831	7396	19936	760	3356	0.971798
Axln_ETREG_B16-1_Skintumor_S9.txt	Axln_ETREG_B16-1_Skintumor_S9	ETREG	AXLN	B16	SKINTUMOR	SKIN	107990	3233	7998	693	2419	0.95595
Axln_ETREG_B16-2_Lungtumor_S24.txt	Axln_ETREG_B16-2_Lungtumor_S24	ETREG	AXLN	B16	LUNGTUMOR	LUNG	462453	1555	3590	632	1943	0.950987
Axln_ETREG_B16-2_Skintumor_S10.txt	Axln_ETREG_B16-2_Skintumor_S10	ETREG	AXLN	B16	SKINTUMOR	SKIN	289863	3172	9901	656	2500	0.949653
Axln_ETREG_B16-3_Lungtumor_S25.txt	Axln_ETREG_B16-3_Lungtumor_S25	ETREG	AXLN	B16	LUNGTUMOR	LUNG	232598	1120	2201	639	1846	0.954847
Axln_ETREG_B16-3_Skintumor_S11.txt	Axln_ETREG_B16-3_Skintumor_S11	ETREG	AXLN	B16	SKINTUMOR	SKIN	280404	4122	11485	720	2690	0.966741
Axln_ETREG_B16-4_Lungtumor_S26.txt	Axln_ETREG_B16-4_Lungtumor_S26	ETREG	AXLN	B16	LUNGTUMOR	LUNG	140501	1025	1751	687	2615	0.960994
Axln_ETREG_Bleo1_Lung_S30.txt	Axln_ETREG_Bleo1_Lung_S30	ETREG	AXLN	BLEO	NONE	LUNG	152426	964	1418	734	2583	0.975814
Axln_ETREG_Bleo2_Lung_S31.txt	Axln_ETREG_Bleo2_Lung_S31	ETREG	AXLN	BLEO	NONE	LUNG	119994	852	1351	670	1953	0.968183
Axln_ETREG_Bleo3_Lung_S32.txt	Axln_ETREG_Bleo3_Lung_S32	ETREG	AXLN	BLEO	NONE	LUNG	20944	457	687	excluded	excluded	excluded
Axln_ETREG_Bleo4_Lung_S33.txt	Axln_ETREG_Bleo4_Lung_S33	ETREG	AXLN	BLEO	NONE	LUNG	116246	999	1608	694	2271	0.964158
Axln_ETREG_CTRL1_S12.txt	Axln_ETREG_CTRL1_S12	ETREG	AXLN	CTRL	NONE	CONTROL	446704	1606	3106	705	2142	0.973182
Axln_ETREG_CTRL2_S13.txt	Axln_ETREG_CTRL2_S13	ETREG	AXLN	CTRL	NONE	CONTROL	367	2	2	excluded	excluded	excluded
Axln_ETREG_CTRL3_S14.txt	Axln_ETREG_CTRL3_S14	ETREG	AXLN	CTRL	NONE	CONTROL	1489	109	114	excluded	excluded	excluded
Axln_ETREG_LLC-1_Lungtumor_S15.txt	Axln_ETREG_LLC-1_Lungtumor_S15	ETREG	AXLN	LLC	LUNGTUMOR	LUNG	68439	789	1440	622	1575	0.954941
Axln_ETREG_LLC-1_Skintumor_S5.txt	Axln_ETREG_LLC-1_Skintumor_S5	ETREG	AXLN	LLC	SKINTUMOR	SKIN	67464	367	574	excluded	excluded	excluded
Axln_ETREG_LLC-2_Lungtumor_S16.txt	Axln_ETREG_LLC-2_Lungtumor_S16	ETREG	AXLN	LLC	LUNGTUMOR	LUNG	100853	956	1847	603	1531	0.957134
Axln_ETREG_LLC-2_Skintumor_S6.txt	Axln_ETREG_LLC-2_Skintumor_S6	ETREG	AXLN	LLC	SKINTUMOR	SKIN	77216	1665	2728	763	2954	0.976447
Axln_ETREG_LLC-3_Lungtumor_S17.txt	Axln_ETREG_LLC-3_Lungtumor_S17	ETREG	AXLN	LLC	LUNGTUMOR	LUNG	119319	2522	5654	730	2911	0.969654
Axln_ETREG_LLC-3_Skintumor_S7.txt	Axln_ETREG_LLC-3_Skintumor_S7	ETREG	AXLN	LLC	SKINTUMOR	SKIN	68862	953	1292	769	3721	0.976795
Axln_ETREG_LLC-4_Lungtumor_S18.txt	Axln_ETREG_LLC-4_Lungtumor_S18	ETREG	AXLN	LLC	LUNGTUMOR	LUNG	75037	975	1971	607	1685	0.95261
Axln_ETREG_LLC-4_Skintumor_S8.txt	Axln_ETREG_LLC-4_Skintumor_S8	ETREG	AXLN	LLC	SKINTUMOR	SKIN	290247	1197	1822	751	3479	0.9764
Axln_ETREG_Pymt-1_Lung_S19.txt	Axln_ETREG_Pymt-1_Lung_S19	ETREG	AXLN	PYMT	LUNGTUMOR	LUNG	521723	3960	8652	765	3469	0.970913
Axln_ETREG_Pymt-1_Skintumor_S1.txt	Axln_ETREG_Pymt-1_Skintumor_S1	ETREG	AXLN	PYMT	SKINTUMOR	SKIN	119055	2170	3946	750	2671	0.972565
Axln_ETREG_Pymt-2_Lung_S20.txt	Axln_ETREG_Pymt-2_Lung_S20	ETREG	AXLN	PYMT	LUNGTUMOR	LUNG	530565	2585	7083	659	2309	0.950066
Axln_ETREG_Pymt-2_Skintumor_S2.txt	Axln_ETREG_Pymt-2_Skintumor_S2	ETREG	AXLN	PYMT	SKINTUMOR	SKIN	133246	2435	5117	738	3067	0.965194
Axln_ETREG_Pymt-3_Lung_S21.txt	Axln_ETREG_Pymt-3_Lung_S21	ETREG	AXLN	PYMT	LUNGTUMOR	LUNG	47022	2452	5895	692	2291	0.968126
Axln_ETREG_Pymt-3_Skintumor_S3.txt	Axln_ETREG_Pymt-3_Skintumor_S3	ETREG	AXLN	PYMT	SKINTUMOR	SKIN	368066	3180	6517	753	3393	0.967494
Axln_ETREG_Pymt-4_Lung__S22.txt	Axln_ETREG_Pymt-4_Lung__S22	ETREG	AXLN	PYMT	LUNGTUMOR	LUNG	612431	4859	12536	750	3710	0.969076
Axln_ETREG_Pymt-4_Skintumor_S4.txt	Axln_ETREG_Pymt-4_Skintumor_S4	ETREG	AXLN	PYMT	SKINTUMOR	SKIN	1203738	5138	15255	681	3184	0.946417
Axln_ETREG_Worm1_Lung_S27.txt	Axln_ETREG_Worm1_Lung_S27	ETREG	AXLN	WORM	NONE	LUNG	157284	635	1293	533	1089	0.947157
Axln_ETREG_Worm2_Lung_S28.txt	Axln_ETREG_Worm2_Lung_S28	ETREG	AXLN	WORM	NONE	LUNG	118512	2236	6331	633	1943	0.956186
Axln_ETREG_Worm3_Lung_S29.txt	Axln_ETREG_Worm3_Lung_S29	ETREG	AXLN	WORM	NONE	LUNG	498694	6061	21312	680	3068	0.94887
Axln_ETREG-B16-4_Skintumor_S12.txt	Axln_ETREG-B16-4_Skintumor_S12	ETREG	AXLN	B16	SKINTUMOR	SKIN	179582	1033	2052	614	2377	0.936527
IgLN_ECD4-B16-1_Lungtumor_S29.txt	IgLN_ECD4-B16-1_Lungtumor_S29	ECD4	IGLN	B16	LUNGTUMOR	LUNG	849573	3778	18993	557	1920	0.921121
IgLN_ECD4-B16-1_Skintumor_S9.txt	IgLN_ECD4-B16-1_Skintumor_S9	ECD4	IGLN	B16	SKINTUMOR	SKIN	128632	2049	6506	544	2533	0.870364
IgLN_ECD4-B16-2_Lungtumor_S30.txt	IgLN_ECD4-B16-2_Lungtumor_S30	ECD4	IGLN	B16	LUNGTUMOR	LUNG	447417	2558	12339	500	1819	0.900938
IgLN_ECD4-B16-2_Skintumor_S10.txt	IgLN_ECD4-B16-2_Skintumor_S10	ECD4	IGLN	B16	SKINTUMOR	SKIN	594429	932	2774	476	1571	0.857595
IgLN_ECD4-B16-3_Lungtumor_S31.txt	IgLN_ECD4-B16-3_Lungtumor_S31	ECD4	IGLN	B16	LUNGTUMOR	LUNG	738329	4496	34945	426	1673	0.846658
IgLN_ECD4-B16-3_Skintumor_S11.txt	IgLN_ECD4-B16-3_Skintumor_S11	ECD4	IGLN	B16	SKINTUMOR	SKIN	481768	5357	46866	354	1660	0.783201
IgLN_ECD4-B16-4_Lungtumor_S32.txt	IgLN_ECD4-B16-4_Lungtumor_S32	ECD4	IGLN	B16	LUNGTUMOR	LUNG	635654	4742	41805	392	1194	0.853339
IgLN_ECD4-Bleo1_Lung_S39.txt	IgLN_ECD4-Bleo1_Lung_S39	ECD4	IGLN	BLEO	NONE	LUNG	470634	5714	27361	632	2123	0.94935
IgLN_ECD4-Bleo1-old_Lung_S42.txt	IgLN_ECD4-Bleo1-old_Lung_S42	ECD4	IGLN	BLEO	NONE	LUNG	655558	1252	4532	492	1278	0.894339
IgLN_ECD4-Bleo2_Lung_S40.txt	IgLN_ECD4-Bleo2_Lung_S40	ECD4	IGLN	BLEO	NONE	LUNG	278753	5510	26288	643	2092	0.958851
IgLN_ECD4-Bleo2-old_Lung_S43.txt	IgLN_ECD4-Bleo2-old_Lung_S43	ECD4	IGLN	BLEO	NONE	LUNG	474432	1936	10529	449	1743	0.886359
IgLN_ECD4-Bleo3_Lung_S41.txt	IgLN_ECD4-Bleo3_Lung_S41	ECD4	IGLN	BLEO	NONE	LUNG	600402	5547	31787	595	1743	0.944675
IgLN_ECD4-Bleo3-old_Lung_S44.txt	IgLN_ECD4-Bleo3-old_Lung_S44	ECD4	IGLN	BLEO	NONE	LUNG	430461	1036	4617	369	994	0.863762
IgLN_ECD4-CTRL1_S12.txt	IgLN_ECD4-CTRL1_S12	ECD4	IGLN	CTRL	NONE	CONTROL	473170	8128	37833	637	3078	0.947769
IgLN_ECD4-CTRL1-old_S15.txt	IgLN_ECD4-CTRL1-old_S15	ECD4	IGLN	CTRL	NONE	CONTROL	234896	669	2960	322	1096	0.804982
IgLN_ECD4-CTRL2_S13.txt	IgLN_ECD4-CTRL2_S13	ECD4	IGLN	CTRL	NONE	CONTROL	470019	7090	28823	672	2852	0.953482
IgLN_ECD4-CTRL2-old_S16.txt	IgLN_ECD4-CTRL2-old_S16	ECD4	IGLN	CTRL	NONE	CONTROL	390902	3614	15194	640	2010	0.957843
IgLN_ECD4-CTRL3_S14.txt	IgLN_ECD4-CTRL3_S14	ECD4	IGLN	CTRL	NONE	CONTROL	477574	6241	22818	686	3784	0.950218
IgLN_ECD4-CTRL3-old_S17.txt	IgLN_ECD4-CTRL3-old_S17	ECD4	IGLN	CTRL	NONE	CONTROL	27882	930	1629	632	1747	0.956908
IgLN_ECD4-CTRL4-old_S18.txt	IgLN_ECD4-CTRL4-old_S18	ECD4	IGLN	CTRL	NONE	CONTROL	514133	4592	31977	549	1488	0.929992
IgLN_ECD4-Flu1_Lung_S45.txt	IgLN_ECD4-Flu1_Lung_S45	ECD4	IGLN	FLU	NONE	LUNG	738080	1652	8039	487	1248	0.923489
IgLN_ECD4-Flu2_Lung_S46.txt	IgLN_ECD4-Flu2_Lung_S46	ECD4	IGLN	FLU	NONE	LUNG	630056	1630	10276	425	1029	0.880865
IgLN_ECD4-Flu3_Lung_S47.txt	IgLN_ECD4-Flu3_Lung_S47	ECD4	IGLN	FLU	NONE	LUNG	618376	2208	9515	560	1608	0.938296
IgLN_ECD4-Flu4_Lung_S48.txt	IgLN_ECD4-Flu4_Lung_S48	ECD4	IGLN	FLU	NONE	LUNG	436293	1898	7052	546	1475	0.93512
IgLN_ECD4-LLC-1_Skintumor_S5.txt	IgLN_ECD4-LLC-1_Skintumor_S5	ECD4	IGLN	LLC	SKINTUMOR	SKIN	574596	943	1767	631	1748	0.941323
IgLN_ECD4-LLC-1-Lungtumor_S19.txt	IgLN_ECD4-LLC-1-Lungtumor_S19	ECD4	IGLN	LLC	LUNGTUMOR	LUNG	424910	4929	29950	586	1844	0.944715
IgLN_ECD4-LLC-1-Lungtumor-old_S22.txt	IgLN_ECD4-LLC-1-Lungtumor-old_S22	ECD4	IGLN	LLC	LUNGTUMOR	LUNG	713644	1428	4675	529	1526	0.9084
IgLN_ECD4-LLC-2_Skintumor_S6.txt	IgLN_ECD4-LLC-2_Skintumor_S6	ECD4	IGLN	LLC	SKINTUMOR	SKIN	153839	1137	2270	608	2064	0.93967
IgLN_ECD4-LLC-2-Lungtumor_S20.txt	IgLN_ECD4-LLC-2-Lungtumor_S20	ECD4	IGLN	LLC	LUNGTUMOR	LUNG	499214	2573	11902	508	1359	0.910243
IgLN_ECD4-LLC-2-Lungtumor-old_S23.txt	IgLN_ECD4-LLC-2-Lungtumor-old_S23	ECD4	IGLN	LLC	LUNGTUMOR	LUNG	488216	2357	9007	552	1785	0.923641
IgLN_ECD4-LLC-3_Skintumor_S7.txt	IgLN_ECD4-LLC-3_Skintumor_S7	ECD4	IGLN	LLC	SKINTUMOR	SKIN	362286	3929	10087	676	2998	0.952801
IgLN_ECD4-LLC-3-Lungtumor_S21.txt	IgLN_ECD4-LLC-3-Lungtumor_S21	ECD4	IGLN	LLC	LUNGTUMOR	LUNG	437203	4546	24967	612	1989	0.93406
IgLN_ECD4-LLC-3-Lungtumor-old_S24.txt	IgLN_ECD4-LLC-3-Lungtumor-old_S24	ECD4	IGLN	LLC	LUNGTUMOR	LUNG	546994	696	2155	438	1139	0.867936
IgLN_ECD4-LLC-4_Skintumor_S8.txt	IgLN_ECD4-LLC-4_Skintumor_S8	ECD4	IGLN	LLC	SKINTUMOR	SKIN	111956	544	1077	515	1598	0.885795
IgLN_ECD4-Pymt-1-Lungtumor_S25.txt	IgLN_ECD4-Pymt-1-Lungtumor_S25	ECD4	IGLN	PYMT	LUNGTUMOR	LUNG	744663	3331	14844	493	2065	0.885869
IgLN_ECD4-Pymt-1-Skintumor_S1.txt	IgLN_ECD4-Pymt-1-Skintumor_S1	ECD4	IGLN	PYMT	SKINTUMOR	SKIN	704455	2492	5365	713	2760	0.965327
IgLN_ECD4-Pymt-2-Lungtumor_S26.txt	IgLN_ECD4-Pymt-2-Lungtumor_S26	ECD4	IGLN	PYMT	LUNGTUMOR	LUNG	452175	4579	21093	513	2077	0.900643
IgLN_ECD4-Pymt-2-Skintumor_S2.txt	IgLN_ECD4-Pymt-2-Skintumor_S2	ECD4	IGLN	PYMT	SKINTUMOR	SKIN	823891	5018	16227	667	3263	0.943157
IgLN_ECD4-Pymt-3-Lungtumor_S27.txt	IgLN_ECD4-Pymt-3-Lungtumor_S27	ECD4	IGLN	PYMT	LUNGTUMOR	LUNG	676467	6521	32571	550	2322	0.893724
IgLN_ECD4-Pymt-3-Skintumor_S3.txt	IgLN_ECD4-Pymt-3-Skintumor_S3	ECD4	IGLN	PYMT	SKINTUMOR	SKIN	166290	509	876	509	1385	0.933484
IgLN_ECD4-Pymt-4-Lungtumor_S28.txt	IgLN_ECD4-Pymt-4-Lungtumor_S28	ECD4	IGLN	PYMT	LUNGTUMOR	LUNG	647230	6420	29915	571	2234	0.918012
IgLN_ECD4-Pymt-4-Skintumor_S4.txt	IgLN_ECD4-Pymt-4-Skintumor_S4	ECD4	IGLN	PYMT	SKINTUMOR	SKIN	677497	3486	10880	649	2164	0.951
IgLN_ECD4-Worm1_Lung_S33.txt	IgLN_ECD4-Worm1_Lung_S33	ECD4	IGLN	WORM	NONE	LUNG	626904	3814	16559	650	1761	0.965129
IgLN_ECD4-Worm1-old_Lung_S36.txt	IgLN_ECD4-Worm1-old_Lung_S36	ECD4	IGLN	WORM	NONE	LUNG	600291	732	1749	509	1149	0.925348
IgLN_ECD4-Worm2_Lung_S34.txt	IgLN_ECD4-Worm2_Lung_S34	ECD4	IGLN	WORM	NONE	LUNG	620137	3742	19494	593	1842	0.937629
IgLN_ECD4-Worm2-old_Lung_S37.txt	IgLN_ECD4-Worm2-old_Lung_S37	ECD4	IGLN	WORM	NONE	LUNG	278807	279	589	excluded	excluded	excluded
IgLN_ECD4-Worm3_S35_Lung.txt	IgLN_ECD4-Worm3_S35_Lung	ECD4	IGLN	WORM	NONE	LUNG	662890	2611	10059	584	1554	0.932284
IgLN_ECD4-Worm3-old_Lung_S38.txt	IgLN_ECD4-Worm3-old_Lung_S38	ECD4	IGLN	WORM	NONE	LUNG	775352	721	2737	401	868	0.874994
IgLN_ETREG-B16-1_Lungtumor_S29.txt	IgLN_ETREG-B16-1_Lungtumor_S29	ETREG	IGLN	B16	LUNGTUMOR	LUNG	324159	896	1483	663	1984	0.966091
IgLN_ETREG-B16-1_Skintumor_S9.txt	IgLN_ETREG-B16-1_Skintumor_S9	ETREG	IGLN	B16	SKINTUMOR	SKIN	799186	1826	3615	693	2352	0.957816
IgLN_ETREG-B16-2_Lungtumor_S30.txt	IgLN_ETREG-B16-2_Lungtumor_S30	ETREG	IGLN	B16	LUNGTUMOR	LUNG	403001	4752	14744	708	3432	0.9559
IgLN_ETREG-B16-2_Skintumor_S10.txt	IgLN_ETREG-B16-2_Skintumor_S10	ETREG	IGLN	B16	SKINTUMOR	SKIN	969194	1627	3238	712	2314	0.969176
IgLN_ETREG-B16-3_Lungtumor_S31.txt	IgLN_ETREG-B16-3_Lungtumor_S31	ETREG	IGLN	B16	LUNGTUMOR	LUNG	79397	1042	1403	789	3625	0.9786
IgLN_ETREG-B16-3_Skintumor_S11.txt	IgLN_ETREG-B16-3_Skintumor_S11	ETREG	IGLN	B16	SKINTUMOR	SKIN	535206	3933	19832	564	1981	0.918723
IgLN_ETREG-B16-4_Lungtumor_S32.txt	IgLN_ETREG-B16-4_Lungtumor_S32	ETREG	IGLN	B16	LUNGTUMOR	LUNG	488910	6137	18569	753	3089	0.971463
IgLN_ETREG-Bleo1_Lung_S39.txt	IgLN_ETREG-Bleo1_Lung_S39	ETREG	IGLN	BLEO	NONE	LUNG	345801	4734	10056	792	4950	0.975244
IgLN_ETREG-Bleo1_old_Lung_S42.txt	IgLN_ETREG-Bleo1_old_Lung_S42	ETREG	IGLN	BLEO	NONE	LUNG	614294	1461	2777	702	2042	0.975468
IgLN_ETREG-Bleo2_Lung_S40.txt	IgLN_ETREG-Bleo2_Lung_S40	ETREG	IGLN	BLEO	NONE	LUNG	592695	4751	11640	769	3593	0.977554
IgLN_ETREG-Bleo2_old_Lung_S43.txt	IgLN_ETREG-Bleo2_old_Lung_S43	ETREG	IGLN	BLEO	NONE	LUNG	238579	1742	3112	743	3030	0.969942
IgLN_ETREG-Bleo3_Lung_S41.txt	IgLN_ETREG-Bleo3_Lung_S41	ETREG	IGLN	BLEO	NONE	LUNG	502058	5973	12016	837	4868	0.984274
IgLN_ETREG-Bleo3_old_Lung_S48.txt	IgLN_ETREG-Bleo3_old_Lung_S48	ETREG	IGLN	BLEO	NONE	LUNG	380037	1438	2460	738	3057	0.974097
IgLN_ETREG-CTRL1_S12.txt	IgLN_ETREG-CTRL1_S12	ETREG	IGLN	CTRL	NONE	CONTROL	540255	3273	7325	718	2902	0.965342
IgLN_ETREG-CTRL1-old_S15.txt	IgLN_ETREG-CTRL1-old_S15	ETREG	IGLN	CTRL	NONE	CONTROL	451958	4331	10879	760	3442	0.973179
IgLN_ETREG-CTRL2_S13.txt	IgLN_ETREG-CTRL2_S13	ETREG	IGLN	CTRL	NONE	CONTROL	557955	2676	5383	773	3175	0.975035
IgLN_ETREG-CTRL2-old_S16.txt	IgLN_ETREG-CTRL2-old_S16	ETREG	IGLN	CTRL	NONE	CONTROL	626257	3586	9012	745	2722	0.973492
IgLN_ETREG-CTRL3_S14.txt	IgLN_ETREG-CTRL3_S14	ETREG	IGLN	CTRL	NONE	CONTROL	665164	3468	6305	799	3354	0.981928
IgLN_ETREG-CTRL3-old_S17.txt	IgLN_ETREG-CTRL3-old_S17	ETREG	IGLN	CTRL	NONE	CONTROL	629525	2806	5725	759	3095	0.975943
IgLN_ETREG-CTRL4-old_S18.txt	IgLN_ETREG-CTRL4-old_S18	ETREG	IGLN	CTRL	NONE	CONTROL	762714	2119	4453	694	2753	0.95996
IgLN_ETREG-Flu1_Lung_S44.txt	IgLN_ETREG-Flu1_Lung_S44	ETREG	IGLN	FLU	NONE	LUNG	401622	2137	4738	713	2855	0.953952
IgLN_ETREG-Flu2_Lung_S45.txt	IgLN_ETREG-Flu2_Lung_S45	ETREG	IGLN	FLU	NONE	LUNG	254893	2201	4304	729	2756	0.971007
IgLN_ETREG-Flu3_Lung_S46.txt	IgLN_ETREG-Flu3_Lung_S46	ETREG	IGLN	FLU	NONE	LUNG	649110	1924	3500	750	3029	0.968489
IgLN_ETREG-Flu4_Lung_S47.txt	IgLN_ETREG-Flu4_Lung_S47	ETREG	IGLN	FLU	NONE	LUNG	398056	2085	3688	757	3095	0.97052
IgLN_ETREG-LLC-1_Lungtumor_S19.txt	IgLN_ETREG-LLC-1_Lungtumor_S19	ETREG	IGLN	LLC	LUNGTUMOR	LUNG	604979	1667	2888	738	2579	0.974473
IgLN_ETREG-LLC-1_Lungtumor_S22_old.txt	IgLN_ETREG-LLC-1_Lungtumor_S22_old	ETREG	IGLN	LLC	LUNGTUMOR	LUNG	566288	3040	8142	694	2818	0.961317
IgLN_ETREG-LLC-1_Skintumor_S5.txt	IgLN_ETREG-LLC-1_Skintumor_S5	ETREG	IGLN	LLC	SKINTUMOR	SKIN	673887	1480	3130	683	2415	0.960694
IgLN_ETREG-LLC-2_Lungtumor_S20.txt	IgLN_ETREG-LLC-2_Lungtumor_S20	ETREG	IGLN	LLC	LUNGTUMOR	LUNG	760560	3529	8340	745	3346	0.972297
IgLN_ETREG-LLC-2_Lungtumor_S23_old.txt	IgLN_ETREG-LLC-2_Lungtumor_S23_old	ETREG	IGLN	LLC	LUNGTUMOR	LUNG	574659	3727	10487	691	2478	0.961744
IgLN_ETREG-LLC-2_Skintumor_S6.txt	IgLN_ETREG-LLC-2_Skintumor_S6	ETREG	IGLN	LLC	SKINTUMOR	SKIN	820572	1277	2322	689	2453	0.966263
IgLN_ETREG-LLC-3_Lungtumor_S21.txt	IgLN_ETREG-LLC-3_Lungtumor_S21	ETREG	IGLN	LLC	LUNGTUMOR	LUNG	586095	3719	14549	598	1844	0.940478
IgLN_ETREG-LLC-3_Lungtumor_S24_old.txt	IgLN_ETREG-LLC-3_Lungtumor_S24_old	ETREG	IGLN	LLC	LUNGTUMOR	LUNG	587378	2780	6008	745	3302	0.970957
IgLN_ETREG-LLC-3_Skintumor_S7.txt	IgLN_ETREG-LLC-3_Skintumor_S7	ETREG	IGLN	LLC	SKINTUMOR	SKIN	727010	1569	3004	710	2691	0.962378
IgLN_ETREG-LLC-4_Skintumor_S8.txt	IgLN_ETREG-LLC-4_Skintumor_S8	ETREG	IGLN	LLC	SKINTUMOR	SKIN	177030	1114	1511	787	3971	0.979082
IgLN_ETREG-Pymt-1_Lungtumor_S25.txt	IgLN_ETREG-Pymt-1_Lungtumor_S25	ETREG	IGLN	PYMT	LUNGTUMOR	LUNG	599953	2330	4805	743	2934	0.967342
IgLN_ETREG-Pymt-1_Skintumor_S1.txt	IgLN_ETREG-Pymt-1_Skintumor_S1	ETREG	IGLN	PYMT	SKINTUMOR	SKIN	714459	2181	4184	751	3055	0.973728
IgLN_ETREG-Pymt-2_Lungtumor_S26.txt	IgLN_ETREG-Pymt-2_Lungtumor_S26	ETREG	IGLN	PYMT	LUNGTUMOR	LUNG	412924	4514	14869	648	2226	0.953437
IgLN_ETREG-Pymt-2_Skintumor_S2.txt	IgLN_ETREG-Pymt-2_Skintumor_S2	ETREG	IGLN	PYMT	SKINTUMOR	SKIN	871524	2615	5308	747	2917	0.973917
IgLN_ETREG-Pymt-3_Lungtumor_S27.txt	IgLN_ETREG-Pymt-3_Lungtumor_S27	ETREG	IGLN	PYMT	LUNGTUMOR	LUNG	244743	1302	2285	689	2224	0.965918
IgLN_ETREG-Pymt-3_Skintumor_S3.txt	IgLN_ETREG-Pymt-3_Skintumor_S3	ETREG	IGLN	PYMT	SKINTUMOR	SKIN	628016	1519	2616	716	2502	0.963385
IgLN_ETREG-Pymt-4_Lungtumor_S28.txt	IgLN_ETREG-Pymt-4_Lungtumor_S28	ETREG	IGLN	PYMT	LUNGTUMOR	LUNG	283169	1454	2441	719	2345	0.971877
IgLN_ETREG-Pymt-4_Skintumor_S4.txt	IgLN_ETREG-Pymt-4_Skintumor_S4	ETREG	IGLN	PYMT	SKINTUMOR	SKIN	779279	2851	6859	733	2701	0.968654
IgLN_ETREG-Worm1_Lung_old_S36.txt	IgLN_ETREG-Worm1_Lung_old_S36	ETREG	IGLN	WORM	NONE	LUNG	405417	1167	1995	717	2467	0.971081
IgLN_ETREG-Worm1_Lung_S33.txt	IgLN_ETREG-Worm1_Lung_S33	ETREG	IGLN	WORM	NONE	LUNG	448387	3394	7225	761	2966	0.977417
IgLN_ETREG-Worm2_Lung_old_S37.txt	IgLN_ETREG-Worm2_Lung_old_S37	ETREG	IGLN	WORM	NONE	LUNG	95801	646	927	646	2373	0.952119
IgLN_ETREG-Worm2_Lung_S34.txt	IgLN_ETREG-Worm2_Lung_S34	ETREG	IGLN	WORM	NONE	LUNG	447686	3451	7693	764	2944	0.978115
IgLN_ETREG-Worm3_Lung_old_S38.txt	IgLN_ETREG-Worm3_Lung_old_S38	ETREG	IGLN	WORM	NONE	LUNG	74987	881	1195	762	3239	0.976712
IgLN_ETREG-Worm3_Lung_S35.txt	IgLN_ETREG-Worm3_Lung_S35	ETREG	IGLN	WORM	NONE	LUNG	674714	3172	6410	794	4055	0.979603
Lung_ECD4-Bleo1_old_S5.txt	Lung_ECD4-Bleo1_old_S5	ECD4	LUNG	BLEO	NONE	LUNG	1915924	3554	39425	404	1040	0.816254
Lung_ECD4-Bleo1_S4.txt	Lung_ECD4-Bleo1_S4	ECD4	LUNG	BLEO	NONE	LUNG	495360	5508	48187	489	1356	0.916372
Lung_ECD4-Bleo2_old_S6.txt	Lung_ECD4-Bleo2_old_S6	ECD4	LUNG	BLEO	NONE	LUNG	1395275	5731	65910	433	1303	0.842337
Lung_ECD4-Bleo2_S5.txt	Lung_ECD4-Bleo2_S5	ECD4	LUNG	BLEO	NONE	LUNG	903165	6638	71207	540	1656	0.938148
Lung_ECD4-Bleo3_old_S7.txt	Lung_ECD4-Bleo3_old_S7	ECD4	LUNG	BLEO	NONE	LUNG	1728756	4426	49427	386	1211	0.807479
Lung_ECD4-Bleo3_S6.txt	Lung_ECD4-Bleo3_S6	ECD4	LUNG	BLEO	NONE	LUNG	242964	4731	31036	541	1493	0.933567
Lung_ECD4-Bleo4_old_S4.txt	Lung_ECD4-Bleo4_old_S4	ECD4	LUNG	BLEO	NONE	LUNG	2721214	869	3062	424	975	0.844276
Lung_ECD4-Bleo4_S7.txt	Lung_ECD4-Bleo4_S7	ECD4	LUNG	BLEO	NONE	LUNG	656147	6381	62441	525	1485	0.921543
Lung_ECD4-Ctrl1_old_S15.txt	Lung_ECD4-Ctrl1_old_S15	ECD4	LUNG	CTRL	NONE	CONTROL	1280083	5183	48333	339	1298	0.569519
Lung_ECD4-Ctrl1_S1.txt	Lung_ECD4-Ctrl1_S1	ECD4	LUNG	CTRL	NONE	CONTROL	14657	1246	2454	630	1962	0.946387
Lung_ECD4-Ctrl2_old_S16.txt	Lung_ECD4-Ctrl2_old_S16	ECD4	LUNG	CTRL	NONE	CONTROL	189110	6813	23238	694	2700	0.960749
Lung_ECD4-Ctrl2_S2.txt	Lung_ECD4-Ctrl2_S2	ECD4	LUNG	CTRL	NONE	CONTROL	42576	2007	5674	538	2262	0.905327
Lung_ECD4-Ctrl3_old_S17.txt	Lung_ECD4-Ctrl3_old_S17	ECD4	LUNG	CTRL	NONE	CONTROL	1256248	3368	19723	545	1574	0.925752
Lung_ECD4-Ctrl3_S3.txt	Lung_ECD4-Ctrl3_S3	ECD4	LUNG	CTRL	NONE	CONTROL	67666	2599	7531	579	2036	0.920585
Lung_ECD4-Flu1_S8.txt	Lung_ECD4-Flu1_S8	ECD4	LUNG	FLU	NONE	LUNG	1284609	10437	79516	446	1969	0.847384
Lung_ECD4-Flu2_S9.txt	Lung_ECD4-Flu2_S9	ECD4	LUNG	FLU	NONE	LUNG	2033097	10730	204990	302	959	0.783022
Lung_ECD4-Flu3_S10.txt	Lung_ECD4-Flu3_S10	ECD4	LUNG	FLU	NONE	LUNG	2084626	4177	168999	174	466	0.708738
Lung_ECD4-Flu4_S11.txt	Lung_ECD4-Flu4_S11	ECD4	LUNG	FLU	NONE	LUNG	1178770	6998	141700	215	560	0.777565
Lung_ECD4-Worm1_old_S12.txt	Lung_ECD4-Worm1_old_S12	ECD4	LUNG	WORM	NONE	LUNG	1151979	7107	95111	386	1224	0.873745
Lung_ECD4-Worm1_S12.txt	Lung_ECD4-Worm1_S12	ECD4	LUNG	WORM	NONE	LUNG	653229	4016	69133	346	966	0.852855
Lung_ECD4-Worm2_old_S13.txt	Lung_ECD4-Worm2_old_S13	ECD4	LUNG	WORM	NONE	LUNG	979984	10370	101712	393	1376	0.820373
Lung_ECD4-Worm2_S13.txt	Lung_ECD4-Worm2_S13	ECD4	LUNG	WORM	NONE	LUNG	642454	5404	89027	342	738	0.861615
Lung_ECD4-Worm3_old_S14.txt	Lung_ECD4-Worm3_old_S14	ECD4	LUNG	WORM	NONE	LUNG	1346249	7329	84189	369	1353	0.832688
Lung_ECD4-Worm3_S14.txt	Lung_ECD4-Worm3_S14	ECD4	LUNG	WORM	NONE	LUNG	625773	5557	93451	343	803	0.880759
Lung_ETREG_Bleo_1_old.txt	Lung_ETREG_Bleo_1_old	ETREG	LUNG	BLEO	NONE	LUNG	555458	2281	12536	482	1798	0.86386
Lung_ETREG_Bleo_2_old.txt	Lung_ETREG_Bleo_2_old	ETREG	LUNG	BLEO	NONE	LUNG	550113	2204	11682	466	1258	0.900558
Lung_ETREG_Bleo_3_old.txt	Lung_ETREG_Bleo_3_old	ETREG	LUNG	BLEO	NONE	LUNG	439733	2356	9831	578	1742	0.935793
Lung_ETREG_Bleo_4_old.txt	Lung_ETREG_Bleo_4_old	ETREG	LUNG	BLEO	NONE	LUNG	592354	627	1151	578	1121	0.960685
Lung_ETREG_Bleo1_S4.txt	Lung_ETREG_Bleo1_S4	ETREG	LUNG	BLEO	NONE	LUNG	417511	2012	12862	468	1288	0.908559
Lung_ETREG_Bleo2_S5.txt	Lung_ETREG_Bleo2_S5	ETREG	LUNG	BLEO	NONE	LUNG	570729	2398	11413	572	1647	0.939111
Lung_ETREG_Bleo3_S6.txt	Lung_ETREG_Bleo3_S6	ETREG	LUNG	BLEO	NONE	LUNG	523039	1835	13864	380	941	0.823547
Lung_ETREG_Bleo4_S7.txt	Lung_ETREG_Bleo4_S7	ETREG	LUNG	BLEO	NONE	LUNG	511852	2083	13619	438	1603	0.881148
Lung_ETREG_Ctrl_1_old.txt	Lung_ETREG_Ctrl_1_old	ETREG	LUNG	CTRL	NONE	CONTROL	556909	1456	2978	689	2312	0.958885
Lung_ETREG_Ctrl_2_old.txt	Lung_ETREG_Ctrl_2_old	ETREG	LUNG	CTRL	NONE	CONTROL	560072	1413	2703	710	2031	0.972163
Lung_ETREG_Ctrl_3_old.txt	Lung_ETREG_Ctrl_3_old	ETREG	LUNG	CTRL	NONE	CONTROL	466458	1017	1977	656	1767	0.96309
Lung_ETREG_CTRL1_S1.txt	Lung_ETREG_CTRL1_S1	ETREG	LUNG	CTRL	NONE	CONTROL	305201	365	724	365	767	0.936649
Lung_ETREG_CTRL2_S2.txt	Lung_ETREG_CTRL2_S2	ETREG	LUNG	CTRL	NONE	CONTROL	272309	186	412	excluded	excluded	excluded
Lung_ETREG_CTRL3_S3.txt	Lung_ETREG_CTRL3_S3	ETREG	LUNG	CTRL	NONE	CONTROL	273334	188	497	excluded	excluded	excluded
Lung_ETREG_Flu_1.txt	Lung_ETREG_Flu_1	ETREG	LUNG	FLU	NONE	LUNG	571315	3711	28527	397	1407	0.816296
Lung_ETREG_Flu_2.txt	Lung_ETREG_Flu_2	ETREG	LUNG	FLU	NONE	LUNG	605148	5794	68818	291	1142	0.682724
Lung_ETREG_Flu_3.txt	Lung_ETREG_Flu_3	ETREG	LUNG	FLU	NONE	LUNG	550279	2204	14431	413	1405	0.847889
Lung_ETREG_Flu_4.txt	Lung_ETREG_Flu_4	ETREG	LUNG	FLU	NONE	LUNG	521533	2553	18821	381	1165	0.829046
Lung_ETREG_Worm_1_old.txt	Lung_ETREG_Worm_1_old	ETREG	LUNG	WORM	NONE	LUNG	460418	3323	20897	535	1790	0.931384
Lung_ETREG_Worm_2_old.txt	Lung_ETREG_Worm_2_old	ETREG	LUNG	WORM	NONE	LUNG	527719	3455	19885	543	1452	0.934098
Lung_ETREG_Worm_3_old.txt	Lung_ETREG_Worm_3_old	ETREG	LUNG	WORM	NONE	LUNG	529016	3494	20163	544	1706	0.914518
Lung_ETREG_Worm1_S12.txt	Lung_ETREG_Worm1_S12	ETREG	LUNG	WORM	NONE	LUNG	542112	1565	8456	471	1015	0.910914
Lung_ETREG_Worm2_S13.txt	Lung_ETREG_Worm2_S13	ETREG	LUNG	WORM	NONE	LUNG	524007	1446	8041	479	1304	0.908601
Lung_ETREG_Worm3_S14.txt	Lung_ETREG_Worm3_S14	ETREG	LUNG	WORM	NONE	LUNG	445707	1521	10676	421	1195	0.872331
Lung_tumor_ECD4-B16-1_S22.txt	Lung_tumor_ECD4-B16-1_S22	ECD4	LUNG	B16	LUNGTUMOR	LUNG	667667	4862	52977	453	1296	0.902314
Lung_tumor_ECD4-B16-2_S23.txt	Lung_tumor_ECD4-B16-2_S23	ECD4	LUNG	B16	LUNGTUMOR	LUNG	521441	4307	39434	465	1201	0.879788
Lung_tumor_ECD4-B16-3_S24.txt	Lung_tumor_ECD4-B16-3_S24	ECD4	LUNG	B16	LUNGTUMOR	LUNG	455016	6951	63027	531	1486	0.930275
Lung_tumor_ECD4-B16-4_S25.txt	Lung_tumor_ECD4-B16-4_S25	ECD4	LUNG	B16	LUNGTUMOR	LUNG	548881	4584	33088	513	1491	0.926427
Lung_tumor_ECD4-LLC-1_S18.txt	Lung_tumor_ECD4-LLC-1_S18	ECD4	LUNG	LLC	LUNGTUMOR	LUNG	481629	1894	4886	623	2275	0.932902
Lung_tumor_ECD4-LLC-2_S19.txt	Lung_tumor_ECD4-LLC-2_S19	ECD4	LUNG	LLC	LUNGTUMOR	LUNG	683774	2402	9842	484	1884	0.881749
Lung_tumor_ECD4-LLC-3_S20.txt	Lung_tumor_ECD4-LLC-3_S20	ECD4	LUNG	LLC	LUNGTUMOR	LUNG	519252	2140	20900	254	709	0.747427
Lung_tumor_ECD4-LLC-4_S21.txt	Lung_tumor_ECD4-LLC-4_S21	ECD4	LUNG	LLC	LUNGTUMOR	LUNG	280087	1665	4203	595	2487	0.930417
Lung_tumor_ECD4-LLC1_old_S1.txt	Lung_tumor_ECD4-LLC1_old_S1	ECD4	LUNG	LLC	LUNGTUMOR	LUNG	1057796	3697	55942	304	937	0.80481
Lung_tumor_ECD4-LLC2_old_S2.txt	Lung_tumor_ECD4-LLC2_old_S2	ECD4	LUNG	LLC	LUNGTUMOR	LUNG	1858433	6541	104632	275	771	0.783779
Lung_tumor_ECD4-LLC3_old_S3.txt	Lung_tumor_ECD4-LLC3_old_S3	ECD4	LUNG	LLC	LUNGTUMOR	LUNG	1413235	3464	38623	326	1079	0.810214
Lung_tumor_ECD4-Pymt-1_S15.txt	Lung_tumor_ECD4-Pymt-1_S15	ECD4	LUNG	PYMT	LUNGTUMOR	LUNG	712363	4971	61462	352	939	0.776622
Lung_tumor_ECD4-Pymt-2_S16.txt	Lung_tumor_ECD4-Pymt-2_S16	ECD4	LUNG	PYMT	LUNGTUMOR	LUNG	692196	4801	80219	291	1047	0.680774
Lung_tumor_ECD4-Pymt-3_S17.txt	Lung_tumor_ECD4-Pymt-3_S17	ECD4	LUNG	PYMT	LUNGTUMOR	LUNG	498575	6371	77609	424	1431	0.86345
Lung_tumor_ECD4-Pymt-4_S46.txt	Lung_tumor_ECD4-Pymt-4_S46	ECD4	LUNG	PYMT	LUNGTUMOR	LUNG	814000	5516	150415	200	660	0.656049
Lung_tumor_ETREG_B16-1_S23.txt	Lung_tumor_ETREG_B16-1_S23	ETREG	LUNG	B16	LUNGTUMOR	LUNG	533989	563	2940	284	679	0.793947
Lung_tumor_ETREG_B16-2_S24.txt	Lung_tumor_ETREG_B16-2_S24	ETREG	LUNG	B16	LUNGTUMOR	LUNG	486188	755	4072	323	745	0.823924
Lung_tumor_ETREG_B16-3_S25.txt	Lung_tumor_ETREG_B16-3_S25	ETREG	LUNG	B16	LUNGTUMOR	LUNG	474784	2290	11444	489	1578	0.901076
Lung_tumor_ETREG_B16-4_S26.txt	Lung_tumor_ETREG_B16-4_S26	ETREG	LUNG	B16	LUNGTUMOR	LUNG	515778	1322	5859	443	1041	0.892094
Lung_tumor_ETreg_LLC_1_old.txt	Lung_tumor_ETreg_LLC_1_old	ETREG	LUNG	LLC	LUNGTUMOR	LUNG	625038	1477	7887	393	1016	0.853274
Lung_tumor_ETreg_LLC_2_old.txt	Lung_tumor_ETreg_LLC_2_old	ETREG	LUNG	LLC	LUNGTUMOR	LUNG	532429	2135	12699	422	1379	0.854843
Lung_tumor_ETreg_LLC_3_old.txt	Lung_tumor_ETreg_LLC_3_old	ETREG	LUNG	LLC	LUNGTUMOR	LUNG	661022	1015	4093	415	1393	0.869116
Lung_tumor_ETREG_LLC-1_S19.txt	Lung_tumor_ETREG_LLC-1_S19	ETREG	LUNG	LLC	LUNGTUMOR	LUNG	444819	582	1436	471	953	0.9306
Lung_tumor_ETREG_LLC-2_S20.txt	Lung_tumor_ETREG_LLC-2_S20	ETREG	LUNG	LLC	LUNGTUMOR	LUNG	402201	1584	6357	508	1322	0.916578
Lung_tumor_ETREG_LLC-3_S21.txt	Lung_tumor_ETREG_LLC-3_S21	ETREG	LUNG	LLC	LUNGTUMOR	LUNG	450043	2332	12441	495	1272	0.89372
Lung_tumor_ETREG_LLC-4_S22.txt	Lung_tumor_ETREG_LLC-4_S22	ETREG	LUNG	LLC	LUNGTUMOR	LUNG	494599	2255	13337	460	1459	0.843234
Lung_tumor_ETREG_Pymt-1_S15.txt	Lung_tumor_ETREG_Pymt-1_S15	ETREG	LUNG	PYMT	LUNGTUMOR	LUNG	344585	1755	17378	306	866	0.78836
Lung_tumor_ETREG_Pymt-2_S16.txt	Lung_tumor_ETREG_Pymt-2_S16	ETREG	LUNG	PYMT	LUNGTUMOR	LUNG	715407	1971	17242	307	942	0.761266
Lung_tumor_ETREG_Pymt-3_S17.txt	Lung_tumor_ETREG_Pymt-3_S17	ETREG	LUNG	PYMT	LUNGTUMOR	LUNG	446473	1084	6962	338	932	0.854166
Lung_tumor_ETREG_Pymt-4_S18.txt	Lung_tumor_ETREG_Pymt-4_S18	ETREG	LUNG	PYMT	LUNGTUMOR	LUNG	448704	2450	17236	431	1119	0.880927
MLN_ECD4-B16-1_Lungtumor_S34.txt	MLN_ECD4-B16-1_Lungtumor_S34	ECD4	MLN	B16	LUNGTUMOR	LUNG	571046	2213	16176	399	1290	0.847659
MLN_ECD4-B16-2_Lungtumor_S35.txt	MLN_ECD4-B16-2_Lungtumor_S35	ECD4	MLN	B16	LUNGTUMOR	LUNG	491454	3374	18843	570	1560	0.930942
MLN_ECD4-B16-3_Lungtumor_S36.txt	MLN_ECD4-B16-3_Lungtumor_S36	ECD4	MLN	B16	LUNGTUMOR	LUNG	548288	2462	17817	383	1275	0.854906
MLN_ECD4-B16-4_Lungtumor_S37.txt	MLN_ECD4-B16-4_Lungtumor_S37	ECD4	MLN	B16	LUNGTUMOR	LUNG	569938	2955	15628	500	1261	0.88984
MLN_ECD4-Bleo1_Lung_S30.txt	MLN_ECD4-Bleo1_Lung_S30	ECD4	MLN	BLEO	NONE	LUNG	280775	3765	16061	630	2381	0.95563
MLN_ECD4-Bleo1_old_Lung_S11.txt	MLN_ECD4-Bleo1_old_Lung_S11	ECD4	MLN	BLEO	NONE	LUNG		2797	8724	674	2385	0.962881
MLN_ECD4-Bleo2_Lung_S31.txt	MLN_ECD4-Bleo2_Lung_S31	ECD4	MLN	BLEO	NONE	LUNG	362518	3532	12514	698	2303	0.969732
MLN_ECD4-Bleo2_old_Lung_S12.txt	MLN_ECD4-Bleo2_old_Lung_S12	ECD4	MLN	BLEO	NONE	LUNG		4308	22996	575	1791	0.920536
MLN_ECD4-Bleo3_Lung_S32.txt	MLN_ECD4-Bleo3_Lung_S32	ECD4	MLN	BLEO	NONE	LUNG	248754	4282	31369	396	1524	0.857206
MLN_ECD4-Bleo3_old_Lung_S13.txt	MLN_ECD4-Bleo3_old_Lung_S13	ECD4	MLN	BLEO	NONE	LUNG		3861	19996	629	2241	0.949435
MLN_ECD4-Bleo4_Lung_S33.txt	MLN_ECD4-Bleo4_Lung_S33	ECD4	MLN	BLEO	NONE	LUNG	260511	4014	17336	613	2026	0.945801
MLN_ECD4-Ctrl1_S27.txt	MLN_ECD4-Ctrl1_S27	ECD4	MLN	CTRL	NONE	CONTROL	355500	581	1647	442	860	0.895811
MLN_ECD4-Ctrl1-old_S17.txt	MLN_ECD4-Ctrl1-old_S17	ECD4	MLN	CTRL	NONE	CONTROL		650	1587	478	1338	0.895224
MLN_ECD4-Ctrl2_S28.txt	MLN_ECD4-Ctrl2_S28	ECD4	MLN	CTRL	NONE	CONTROL	491341	1850	7968	474	1646	0.894793
MLN_ECD4-Ctrl2-old_S18.txt	MLN_ECD4-Ctrl2-old_S18	ECD4	MLN	CTRL	NONE	CONTROL		817	2050	498	1222	0.924609
MLN_ECD4-Ctrl3_S29.txt	MLN_ECD4-Ctrl3_S29	ECD4	MLN	CTRL	NONE	CONTROL	351617	1244	3238	540	1560	0.908408
MLN_ECD4-Ctrl3-old_S19.txt	MLN_ECD4-Ctrl3-old_S19	ECD4	MLN	CTRL	NONE	CONTROL		1594	3376	627	2261	0.94051
MLN_ECD4-Flu1_Lung_S1.txt	MLN_ECD4-Flu1_Lung_S1	ECD4	MLN	FLU	NONE	LUNG		6258	58780	382	1754	0.808223
MLN_ECD4-Flu2_Lung_S2.txt	MLN_ECD4-Flu2_Lung_S2	ECD4	MLN	FLU	NONE	LUNG		4934	43592	380	1364	0.826709
MLN_ECD4-Flu3_Lung_S3.txt	MLN_ECD4-Flu3_Lung_S3	ECD4	MLN	FLU	NONE	LUNG		3706	60489	295	959	0.789509
MLN_ECD4-Flu4_Lung_S4.txt	MLN_ECD4-Flu4_Lung_S4	ECD4	MLN	FLU	NONE	LUNG		1716	15641	322	845	0.809062
MLN_ECD4-LLC-1_Lungtumor_old_S8.txt	MLN_ECD4-LLC-1_Lungtumor_old_S8	ECD4	MLN	LLC	LUNGTUMOR	LUNG		3086	39227	344	1111	0.828255
MLN_ECD4-LLC-1_Lungtumor_S45.txt	MLN_ECD4-LLC-1_Lungtumor_S45	ECD4	MLN	LLC	LUNGTUMOR	LUNG	222179	342	832	342	493	0.931967
MLN_ECD4-LLC-2_Lungtumor_old_S9.txt	MLN_ECD4-LLC-2_Lungtumor_old_S9	ECD4	MLN	LLC	LUNGTUMOR	LUNG		3745	52024	306	1347	0.732569
MLN_ECD4-LLC-2_Lungtumor_S46.txt	MLN_ECD4-LLC-2_Lungtumor_S46	ECD4	MLN	LLC	LUNGTUMOR	LUNG	597159	2594	20833	387	1079	0.855713
MLN_ECD4-LLC-3_Lungtumor_old_S10.txt	MLN_ECD4-LLC-3_Lungtumor_old_S10	ECD4	MLN	LLC	LUNGTUMOR	LUNG		2495	24401	384	1495	0.815065
MLN_ECD4-LLC-3_Lungtumor_S47.txt	MLN_ECD4-LLC-3_Lungtumor_S47	ECD4	MLN	LLC	LUNGTUMOR	LUNG	359344	4112	33770	457	1371	0.896501
MLN_ECD4-LLC-4_Lungtumor_S48.txt	MLN_ECD4-LLC-4_Lungtumor_S48	ECD4	MLN	LLC	LUNGTUMOR	LUNG	638839	3903	30842	460	1641	0.879022
MLN_ECD4-Pymt-1_Lungtumor_S41.txt	MLN_ECD4-Pymt-1_Lungtumor_S41	ECD4	MLN	PYMT	LUNGTUMOR	LUNG	435718	3803	33508	395	1148	0.820839
MLN_ECD4-Pymt-2_Lungtumor_S42.txt	MLN_ECD4-Pymt-2_Lungtumor_S42	ECD4	MLN	PYMT	LUNGTUMOR	LUNG	396080	4275	40418	351	1134	0.774761
MLN_ECD4-Pymt-3_Lungtumor_S43.txt	MLN_ECD4-Pymt-3_Lungtumor_S43	ECD4	MLN	PYMT	LUNGTUMOR	LUNG	572083	6149	66176	408	1178	0.854677
MLN_ECD4-Pymt-4_Lungtumor_S44.txt	MLN_ECD4-Pymt-4_Lungtumor_S44	ECD4	MLN	PYMT	LUNGTUMOR	LUNG	677593	5201	72957	307	1207	0.782578
MLN_ECD4-Worm1_Lung_S38.txt	MLN_ECD4-Worm1_Lung_S38	ECD4	MLN	WORM	NONE	LUNG	555518	7198	80865	410	1550	0.857454
MLN_ECD4-Worm1_old_Lung_S5.txt	MLN_ECD4-Worm1_old_Lung_S5	ECD4	MLN	WORM	NONE	LUNG		4576	62991	389	1079	0.817249
MLN_ECD4-Worm2_Lung_S39.txt	MLN_ECD4-Worm2_Lung_S39	ECD4	MLN	WORM	NONE	LUNG	742170	842	3673	419	872	0.902521
MLN_ECD4-Worm2_old_Lung_S6.txt	MLN_ECD4-Worm2_old_Lung_S6	ECD4	MLN	WORM	NONE	LUNG		4139	39493	488	1577	0.888642
MLN_ECD4-Worm3_Lung_S40.txt	MLN_ECD4-Worm3_Lung_S40	ECD4	MLN	WORM	NONE	LUNG	501909	3937	55276	398	1051	0.878254
MLN_ECD4-Worm3_old_Lung_S7.txt	MLN_ECD4-Worm3_old_Lung_S7	ECD4	MLN	WORM	NONE	LUNG		2325	16868	450	1330	0.892588
MLN_Etreg-B16-1-Lungtumor_S8.txt	MLN_Etreg-B16-1-Lungtumor_S8	ETREG	MLN	B16	LUNGTUMOR	LUNG	473653	1640	4870	570	1703	0.940608
MLN_Etreg-B16-2-Lungtumor_S9.txt	MLN_Etreg-B16-2-Lungtumor_S9	ETREG	MLN	B16	LUNGTUMOR	LUNG	430057	3533	10434	688	2335	0.962672
MLN_Etreg-B16-3-Lungtumor_S10.txt	MLN_Etreg-B16-3-Lungtumor_S10	ETREG	MLN	B16	LUNGTUMOR	LUNG	800936	1812	4969	640	2038	0.95489
MLN_Etreg-B16-4-Lungtumor_S11.txt	MLN_Etreg-B16-4-Lungtumor_S11	ETREG	MLN	B16	LUNGTUMOR	LUNG	621361	2777	7745	688	2354	0.964913
MLN_Etreg-Bleo1_Lung_S4.txt	MLN_Etreg-Bleo1_Lung_S4	ETREG	MLN	BLEO	NONE	LUNG	219466	1314	2716	645	1857	0.954137
MLN_ETREG-Bleo1_old_Lung_S11.txt	MLN_ETREG-Bleo1_old_Lung_S11	ETREG	MLN	BLEO	NONE	LUNG	1363561	3031	10698	698	2199	0.967546
MLN_Etreg-Bleo2_Lung_S5.txt	MLN_Etreg-Bleo2_Lung_S5	ETREG	MLN	BLEO	NONE	LUNG	251902	733	1439	580	1256	0.941214
MLN_ETREG-Bleo2_old_Lung_S12.txt	MLN_ETREG-Bleo2_old_Lung_S12	ETREG	MLN	BLEO	NONE	LUNG	1359443	3022	9438	707	2194	0.96799
MLN_Etreg-Bleo3_Lung_S6.txt	MLN_Etreg-Bleo3_Lung_S6	ETREG	MLN	BLEO	NONE	LUNG	765744	2789	8525	676	2049	0.962804
MLN_ETREG-Bleo3_old_Lung_S13.txt	MLN_ETREG-Bleo3_old_Lung_S13	ETREG	MLN	BLEO	NONE	LUNG	2128085	3524	11723	715	2489	0.965555
MLN_Etreg-Bleo4_Lung__S7.txt	MLN_Etreg-Bleo4_Lung__S7	ETREG	MLN	BLEO	NONE	LUNG	845011	1138	3055	602	1585	0.951174
MLN_ETREG-Ctrl1_old_S14.txt	MLN_ETREG-Ctrl1_old_S14	ETREG	MLN	CTRL	NONE	CONTROL	1099223	1161	2838	553	1687	0.929191
MLN_Etreg-Ctrl1_S1.txt	MLN_Etreg-Ctrl1_S1	ETREG	MLN	CTRL	NONE	CONTROL	61770	287	487	excluded	excluded	excluded
MLN_ETREG-Ctrl2_old_S15.txt	MLN_ETREG-Ctrl2_old_S15	ETREG	MLN	CTRL	NONE	CONTROL	1305392	1569	3523	616	2006	0.941723
MLN_Etreg-Ctrl2_S2.txt	MLN_Etreg-Ctrl2_S2	ETREG	MLN	CTRL	NONE	CONTROL	635451	1675	4565	653	1829	0.960292
MLN_ETREG-Ctrl3_old_S16.txt	MLN_ETREG-Ctrl3_old_S16	ETREG	MLN	CTRL	NONE	CONTROL	1532935	1654	4146	625	1905	0.947176
MLN_Etreg-Ctrl3_S3.txt	MLN_Etreg-Ctrl3_S3	ETREG	MLN	CTRL	NONE	CONTROL	82694	492	834	492	1178	0.936336
MLN_ETREG-Flu1_Lung_S1.txt	MLN_ETREG-Flu1_Lung_S1	ETREG	MLN	FLU	NONE	LUNG	2297763	4397	21628	602	2785	0.906827
MLN_ETREG-Flu2_Lung_S2.txt	MLN_ETREG-Flu2_Lung_S2	ETREG	MLN	FLU	NONE	LUNG	2481584	3783	18177	611	2492	0.912867
MLN_ETREG-Flu3_Lung_S3.txt	MLN_ETREG-Flu3_Lung_S3	ETREG	MLN	FLU	NONE	LUNG	1431609	3057	13986	589	1706	0.910493
MLN_ETREG-Flu4_Lung_S4.txt	MLN_ETREG-Flu4_Lung_S4	ETREG	MLN	FLU	NONE	LUNG	1315203	1786	8190	502	1290	0.879801
MLN_Etreg-LLC-1_Lungtumor_S19.txt	MLN_Etreg-LLC-1_Lungtumor_S19	ETREG	MLN	LLC	LUNGTUMOR	LUNG	703300	533	2572	321	618	0.853615
MLN_ETREG-LLC-1_old_Lungtumor_S8.txt	MLN_ETREG-LLC-1_old_Lungtumor_S8	ETREG	MLN	LLC	LUNGTUMOR	LUNG	1477299	2596	10882	619	1811	0.947472
MLN_Etreg-LLC-2_Lungtumor_S20.txt	MLN_Etreg-LLC-2_Lungtumor_S20	ETREG	MLN	LLC	LUNGTUMOR	LUNG	812082	1866	5949	631	1888	0.958563
MLN_ETREG-LLC-2_old_Lungtumor_S9.txt	MLN_ETREG-LLC-2_old_Lungtumor_S9	ETREG	MLN	LLC	LUNGTUMOR	LUNG	1605371	2195	8262	616	1937	0.947731
MLN_Etreg-LLC-3_Lungtumor_S21.txt	MLN_Etreg-LLC-3_Lungtumor_S21	ETREG	MLN	LLC	LUNGTUMOR	LUNG	574441	1737	5108	618	1935	0.946967
MLN_ETREG-LLC-3_old_Lungtumor_S10.txt	MLN_ETREG-LLC-3_old_Lungtumor_S10	ETREG	MLN	LLC	LUNGTUMOR	LUNG	1716857	2105	9583	555	1447	0.927515
MLN_Etreg-LLC-4_Lungtumor_S22.txt	MLN_Etreg-LLC-4_Lungtumor_S22	ETREG	MLN	LLC	LUNGTUMOR	LUNG	580278	1854	6019	589	1681	0.938664
MLN_Etreg-Pymt1_Lungtumor_S15.txt	MLN_Etreg-Pymt1_Lungtumor_S15	ETREG	MLN	PYMT	LUNGTUMOR	LUNG	643659	2641	9477	625	2294	0.946455
MLN_Etreg-Pymt2_Lungtumor_S16.txt	MLN_Etreg-Pymt2_Lungtumor_S16	ETREG	MLN	PYMT	LUNGTUMOR	LUNG	781780	2585	8840	590	2065	0.932817
MLN_Etreg-Pymt3_Lungtumor_S17.txt	MLN_Etreg-Pymt3_Lungtumor_S17	ETREG	MLN	PYMT	LUNGTUMOR	LUNG	485039	3008	11196	613	1882	0.940628
MLN_Etreg-Pymt4_Lungtumor_S18.txt	MLN_Etreg-Pymt4_Lungtumor_S18	ETREG	MLN	PYMT	LUNGTUMOR	LUNG	641501	1614	4020	616	2006	0.927644
MLN_ETREG-Worm1_old_Lung_S5.txt	MLN_ETREG-Worm1_old_Lung_S5	ETREG	MLN	WORM	NONE	LUNG	2017977	3311	15875	635	1860	0.945671
MLN_Etreg-Worm1-Lung_S12.txt	MLN_Etreg-Worm1-Lung_S12	ETREG	MLN	WORM	NONE	LUNG	564973	1340	4800	538	1338	0.919815
MLN_ETREG-Worm2_old_Lung_S6.txt	MLN_ETREG-Worm2_old_Lung_S6	ETREG	MLN	WORM	NONE	LUNG	1669355	3070	13369	635	2096	0.947108
MLN_Etreg-Worm2-Lung_S13.txt	MLN_Etreg-Worm2-Lung_S13	ETREG	MLN	WORM	NONE	LUNG	27352	93	165	excluded	excluded	excluded
MLN_ETREG-Worm3_old_Lung_S7.txt	MLN_ETREG-Worm3_old_Lung_S7	ETREG	MLN	WORM	NONE	LUNG	956129	1992	7092	632	1715	0.95697
MLN_Etreg-Worm3-Lung_S14.txt	MLN_Etreg-Worm3-Lung_S14	ETREG	MLN	WORM	NONE	LUNG	538375	1608	6261	538	1280	0.913567
Skin_tumor_ECD4-B16-1_S30.txt	Skin_tumor_ECD4-B16-1_S30	ECD4	SKIN	B16	SKINTUMOR	SKIN	262626	1981	5417	585	2209	0.923553
Skin_tumor_ECD4-B16-2_S31.txt	Skin_tumor_ECD4-B16-2_S31	ECD4	SKIN	B16	SKINTUMOR	SKIN	653644	2578	24475	297	863	0.733341
Skin_tumor_ECD4-B16-3_S32.txt	Skin_tumor_ECD4-B16-3_S32	ECD4	SKIN	B16	SKINTUMOR	SKIN	543553	3951	46693	309	801	0.770183
Skin_tumor_ECD4-LLC-1_S26.txt	Skin_tumor_ECD4-LLC-1_S26	ECD4	SKIN	LLC	SKINTUMOR	SKIN	521829	3688	37152	375	1316	0.846967
Skin_tumor_ECD4-LLC-2_S27.txt	Skin_tumor_ECD4-LLC-2_S27	ECD4	SKIN	LLC	SKINTUMOR	SKIN	29431	1054	3552	372	1673	0.707165
Skin_tumor_ECD4-LLC-3_S28.txt	Skin_tumor_ECD4-LLC-S28	ECD4	SKIN	LLC	SKINTUMOR	SKIN	325359	1968	49712	190	434	0.539633
Skin_tumor_ECD4-LLC-4_S29.txt	Skin_tumor_ECD4-LLC-4_S29	ECD4	SKIN	LLC	SKINTUMOR	SKIN	594000	1677	17610	410	821	0.877182
Skin_tumor_ECD4-LLC-5_old_S41.txt	Skin_tumor_ECD4-LLC-5_old_S41	ECD4	SKIN	LLC	SKINTUMOR	SKIN	410983	6728	88706	166	1377	0.567465
Skin_tumor_ECD4-LLC-6_old_S42.txt	Skin_tumor_ECD4-LLC-6_old_S42	ECD4	SKIN	LLC	SKINTUMOR	SKIN	474327	1672	23235	120	701	0.554031
Skin_tumor_ECD4-LLC-7_old_S43.txt	Skin_tumor_ECD4-LLC-7_old_S43	ECD4	SKIN	LLC	SKINTUMOR	SKIN	539420	2104	53787	400	833	0.848642
Skin_tumor_ECD4-LLC-8_old_S44.txt	Skin_tumor_ECD4-LLC-8_old_S44	ECD4	SKIN	LLC	SKINTUMOR	SKIN	642931	3592	32751	106	1227	0.489328
Skin_tumor_ECD4-Pymt-1_S33.txt	Skin_tumor_ECD4-Pymt-1_S33	ECD4	SKIN	PYMT	SKINTUMOR	SKIN	582308	4337	19679	539	1882	0.925179
Skin_tumor_ECD4-Pymt-2_S34.txt	Skin_tumor_ECD4-Pymt-2_S34	ECD4	SKIN	PYMT	SKINTUMOR	SKIN	499884	6054	38159	570	1716	0.938113
Skin_tumor_ECD4-Pymt-3_S35.txt	Skin_tumor_ECD4-Pymt-3_S35	ECD4	SKIN	PYMT	SKINTUMOR	SKIN	469055	3781	20348	475	1612	0.891775
Skin_tumor_ECD4-Pymt-4_S36.txt	Skin_tumor_ECD4-Pymt-4_S36	ECD4	SKIN	PYMT	SKINTUMOR	SKIN	534600	5836	44008	500	1426	0.909995
Skin_tumor_ECD4-Pymt-5_old_S37.txt	Skin_tumor_ECD4-Pymt-5_old_S37	ECD4	SKIN	PYMT	SKINTUMOR	SKIN	696848	2676	22433	271	1039	0.681643
Skin_tumor_ECD4-Pymt-6_old_S38.txt	Skin_tumor_ECD4-Pymt-6_old_S38	ECD4	SKIN	PYMT	SKINTUMOR	SKIN	537175	4064	36206	330	1416	0.722592
Skin_tumor_ECD4-Pymt-7_old_S39.txt	Skin_tumor_ECD4-Pymt-7_old_S39	ECD4	SKIN	PYMT	SKINTUMOR	SKIN	712402	3762	49156	238	1312	0.708388
Skin_tumor_ECD4-Pymt-8_old_S40.txt	Skin_tumor_ECD4-Pymt-8_old_S40	ECD4	SKIN	PYMT	SKINTUMOR	SKIN	593205	3374	19708	421	1502	0.849008
Skin_tumor_ETREG_B16-1_S31.txt	Skin_tumor_ETREG_B16-1_S31	ETREG	SKIN	B16	SKINTUMOR	SKIN	767901	241	1132	219	378	0.801564
Skin_tumor_ETREG_B16-2_S32.txt	Skin_tumor_ETREG_B16-2_S32	ETREG	SKIN	B16	SKINTUMOR	SKIN	492580	768	7619	233	747	0.776184
Skin_tumor_ETREG_B16-3_S33.txt	Skin_tumor_ETREG_B16-3_S33	ETREG	SKIN	B16	SKINTUMOR	SKIN	603046	831	9204	249	573	0.830747
Skin_tumor_ETREG_LLC-1_S27.txt	Skin_tumor_ETREG_LLC-1_S27	ETREG	SKIN	LLC	SKINTUMOR	SKIN	389018	131	741	131	225	0.583742
Skin_tumor_ETREG_LLC-2_S28.txt	Skin_tumor_ETREG_LLC-2_S28	ETREG	SKIN	LLC	SKINTUMOR	SKIN	494769	294	1819	202	422	0.621308
Skin_tumor_ETREG_LLC-3_S29.txt	Skin_tumor_ETREG_LLC-3_S29	ETREG	SKIN	LLC	SKINTUMOR	SKIN	732198	300	1447	255	491	0.752208
Skin_tumor_ETREG_LLC-4_S30.txt	Skin_tumor_ETREG_LLC-4_S30	ETREG	SKIN	LLC	SKINTUMOR	SKIN	949530	208	1669	167	250	0.589395
Skin_tumor_ETREG_LLC-5_old_S42.txt	Skin_tumor_ETREG_LLC-5_old_S42	ETREG	SKIN	LLC	SKINTUMOR	SKIN	805510	478	1975	330	606	0.844175
Skin_tumor_ETREG_LLC-6_old_S43.txt	Skin_tumor_ETREG_LLC-6_old_S43	ETREG	SKIN	LLC	SKINTUMOR	SKIN	588884	585	2695	335	719	0.843761
Skin_tumor_ETREG_LLC-7_old_S44.txt	Skin_tumor_ETREG_LLC-7_old_S44	ETREG	SKIN	LLC	SKINTUMOR	SKIN	592815	690	2194	419	1065	0.887013
Skin_tumor_ETREG_LLC-8_old_S45.txt	Skin_tumor_ETREG_LLC-8_old_S45	ETREG	SKIN	LLC	SKINTUMOR	SKIN	685795	177	766	177	290	0.792513
Skin_tumor_ETREG_Pymt-1_S34.txt	Skin_tumor_ETREG_Pymt-1_S34	ETREG	SKIN	PYMT	SKINTUMOR	SKIN	415192	651	1835	443	1065	0.874178
Skin_tumor_ETREG_Pymt-2_S35.txt	Skin_tumor_ETREG_Pymt-2_S35	ETREG	SKIN	PYMT	SKINTUMOR	SKIN	453819	1537	4696	596	1434	0.958214
Skin_tumor_ETREG_Pymt-3_S36.txt	Skin_tumor_ETREG_Pymt-3_S36	ETREG	SKIN	PYMT	SKINTUMOR	SKIN	657291	694	2251	431	946	0.908921
Skin_tumor_ETREG_Pymt-4_S37.txt	Skin_tumor_ETREG_Pymt-4_S37	ETREG	SKIN	PYMT	SKINTUMOR	SKIN	425311	1275	4348	552	1335	0.945916
Skin_tumor_ETREG_Pymt-5_old_S38.txt	Skin_tumor_ETREG_Pymt-5_old_S38	ETREG	SKIN	PYMT	SKINTUMOR	SKIN	670072	829	2924	435	936	0.875269
Skin_tumor_ETREG_Pymt-6_old_S39.txt	Skin_tumor_ETREG_Pymt-6_old_S39	ETREG	SKIN	PYMT	SKINTUMOR	SKIN	729714	478	1415	404	820	0.866045
Skin_tumor_ETREG_Pymt-7_old_S40.txt	Skin_tumor_ETREG_Pymt-7_old_S40	ETREG	SKIN	PYMT	SKINTUMOR	SKIN	746102	622	1865	407	838	0.870954
Skin_tumor_ETREG_Pymt-8_old_S41.txt	Skin_tumor_ETREG_Pymt-8_old_S41	ETREG	SKIN	PYMT	SKINTUMOR	SKIN	496500	502	1155	458	828	0.928862
Spl_ECD4-B16-1_Lungtumor_S26.txt	Spl_ECD4-B16-1_Lungtumor_S26	ECD4	SPL	B16	LUNGTUMOR	LUNG	520882	11286	94245	386	1630	0.801067
Spl_ECD4-B16-1_Skintumor_S30.txt	Spl_ECD4-B16-1_Skintumor_S30	ECD4	SPL	B16	SKINTUMOR	SKIN	193748	6674	33327	487	2274	0.856168
Spl_ECD4-B16-2_Lungtumor_S27.txt	Spl_ECD4-B16-2_Lungtumor_S27	ECD4	SPL	B16	LUNGTUMOR	LUNG	280202	10630	47671	571	3262	0.901623
Spl_ECD4-B16-2_Skintumor_S31.txt	Spl_ECD4-B16-2_Skintumor_S31	ECD4	SPL	B16	SKINTUMOR	SKIN	291226	9978	51428	512	2339	0.890068
Spl_ECD4-B16-3_Lungtumor_S28.txt	Spl_ECD4-B16-3_Lungtumor_S28	ECD4	SPL	B16	LUNGTUMOR	LUNG	286604	11884	43868	662	3488	0.9451
Spl_ECD4-B16-3_Skintumor_S32.txt	Spl_ECD4-B16-3_Skintumor_S32	ECD4	SPL	B16	SKINTUMOR	SKIN	366316	15006	59475	652	3149	0.929946
Spl_ECD4-B16-4_Lungtumor_S29.txt	Spl_ECD4-B16-4_Lungtumor_S29	ECD4	SPL	B16	LUNGTUMOR	LUNG	430829	13698	75420	530	2433	0.888437
Spl_ECD4-Bleo1_Lung_old_S37.txt	Spl_ECD4-Bleo1_Lung_old_S37	ECD4	SPL	BLEO	NONE	LUNG	186733	9355	31312	683	3528	0.951186
Spl_ECD4-Bleo1_Lung_S33.txt	Spl_ECD4-Bleo1_Lung_S33	ECD4	SPL	BLEO	NONE	LUNG	321514	10688	47329	721	3000	0.965647
Spl_ECD4-Bleo2_Lung_old_S38.txt	Spl_ECD4-Bleo2_Lung_old_S38	ECD4	SPL	BLEO	NONE	LUNG	212889	11313	31686	743	3457	0.966079
Spl_ECD4-Bleo2_Lung_S34.txt	Spl_ECD4-Bleo2_Lung_S34	ECD4	SPL	BLEO	NONE	LUNG	398184	15161	63405	642	2790	0.929166
Spl_ECD4-Bleo3_Lung_old_S39.txt	Spl_ECD4-Bleo3_Lung_old_S39	ECD4	SPL	BLEO	NONE	LUNG	413769	15426	61970	657	4383	0.936926
Spl_ECD4-Bleo3_Lung_S35.txt	Spl_ECD4-Bleo3_Lung_S35	ECD4	SPL	BLEO	NONE	LUNG	410549	13031	56206	683	2911	0.944453
Spl_ECD4-Bleo4_Lung_S36.txt	Spl_ECD4-Bleo4_Lung_S36	ECD4	SPL	BLEO	NONE	LUNG	471199	11053	68343	667	2735	0.943649
Spl_ECD4-Ctrl1_S1.txt	Spl_ECD4-Ctrl1_S1	ECD4	SPL	CTRL	NONE	CONTROL	567355	22027	86365	696	3990	0.947086
Spl_ECD4-Ctrl1-old_S4.txt	Spl_ECD4-Ctrl1-old_S4	ECD4	SPL	CTRL	NONE	CONTROL	608803	12419	72149	514	2906	0.788303
Spl_ECD4-Ctrl2_S2.txt	Spl_ECD4-Ctrl2_S2	ECD4	SPL	CTRL	NONE	CONTROL	776264	26469	111526	758	3692	0.970984
Spl_ECD4-Ctrl2-old_S5.txt	Spl_ECD4-Ctrl2-old_S5	ECD4	SPL	CTRL	NONE	CONTROL	248123	10281	38004	585	3324	0.886054
Spl_ECD4-Ctrl3_S3.txt	Spl_ECD4-Ctrl3_S3	ECD4	SPL	CTRL	NONE	CONTROL	341474	15001	54520	699	4415	0.949384
Spl_ECD4-Ctrl3-old_S6.txt	Spl_ECD4-Ctrl3-old_S6	ECD4	SPL	CTRL	NONE	CONTROL	329919	14703	52619	706	3632	0.952759
Spl_ECD4-Flu1_Lung_S40.txt	Spl_ECD4-Flu1_Lung_S40	ECD4	SPL	FLU	NONE	LUNG	706827	10064	79967	384	2493	0.797796
Spl_ECD4-Flu2_Lung_S41.txt	Spl_ECD4-Flu2_Lung_S41	ECD4	SPL	FLU	NONE	LUNG	464402	13618	83654	483	2778	0.835944
Spl_ECD4-Flu3_Lung_S42.txt	Spl_ECD4-Flu3_Lung_S42	ECD4	SPL	FLU	NONE	LUNG	295273	6719	50780	397	1243	0.831953
Spl_ECD4-Flu4_Lung_S43.txt	Spl_ECD4-Flu4_Lung_S43	ECD4	SPL	FLU	NONE	LUNG	443965	7011	66109	354	1813	0.803238
Spl_ECD4-LLC-1_Lungtumor_old_S11.txt	Spl_ECD4-LLC-1_Lungtumor_old_S11	ECD4	SPL	LLC	LUNGTUMOR	LUNG	266011	9209	45679	541	1834	0.898804
Spl_ECD4-LLC-1_Lungtumor_S7.txt	Spl_ECD4-LLC-1_Lungtumor_S7	ECD4	SPL	LLC	LUNGTUMOR	LUNG	336380	18947	51181	781	4728	0.971603
Spl_ECD4-LLC-1_Skintumor_S14.txt	Spl_ECD4-LLC-1_Skintumor_S14	ECD4	SPL	LLC	SKINTUMOR	SKIN	610165	12840	102066	447	1731	0.841175
Spl_ECD4-LLC-2_Lungtumor_old_S12.txt	Spl_ECD4-LLC-2_Lungtumor_old_S12	ECD4	SPL	LLC	LUNGTUMOR	LUNG	546851	10793	65772	547	2352	0.914284
Spl_ECD4-LLC-2_Lungtumor_S8.txt	Spl_ECD4-LLC-2_Lungtumor_S8	ECD4	SPL	LLC	LUNGTUMOR	LUNG	185133	10401	32528	567	4500	0.812569
Spl_ECD4-LLC-2_Skintumor_S15.txt	Spl_ECD4-LLC-2_Skintumor_S15	ECD4	SPL	LLC	SKINTUMOR	SKIN	703858	13975	119833	355	2019	0.76714
Spl_ECD4-LLC-3_Lungtumor_old_S13.txt	Spl_ECD4-LLC-3_Lungtumor_old_S13	ECD4	SPL	LLC	LUNGTUMOR	LUNG	481355	13789	71935	575	2786	0.920633
Spl_ECD4-LLC-3_Lungtumor_S9.txt	Spl_ECD4-LLC-3_Lungtumor_S9	ECD4	SPL	LLC	LUNGTUMOR	LUNG	514178	20529	80251	602	3680	0.903337
Spl_ECD4-LLC-3_Skintumor_S16.txt	Spl_ECD4-LLC-3_Skintumor_S16	ECD4	SPL	LLC	SKINTUMOR	SKIN	493515	15741	85817	615	2070	0.94156
Spl_ECD4-LLC-4_Lungtumor_S10.txt	Spl_ECD4-LLC-4_Lungtumor_S10	ECD4	SPL	LLC	LUNGTUMOR	LUNG	449213	5509	28716	547	2952	0.889762
Spl_ECD4-LLC-4_Skintumor_S17.txt	Spl_ECD4-LLC-4_Skintumor_S17	ECD4	SPL	LLC	SKINTUMOR	SKIN	354283	11722	48579	711	3152	0.963204
Spl_ECD4-Pymt-1_Lungtumor_S18.txt	Spl_ECD4-Pymt-1_Lungtumor_S18	ECD4	SPL	PYMT	LUNGTUMOR	LUNG	307392	14600	54383	626	3681	0.929503
Spl_ECD4-Pymt-1_Skintumor_S22.txt	Spl_ECD4-Pymt-1_Skintumor_S22	ECD4	SPL	PYMT	SKINTUMOR	SKIN	338679	8437	50778	590	1913	0.901629
Spl_ECD4-Pymt-2_Lungtumor_S19.txt	Spl_ECD4-Pymt-2_Lungtumor_S19	ECD4	SPL	PYMT	LUNGTUMOR	LUNG	305203	8654	39885	378	2195	0.753174
Spl_ECD4-Pymt-2_Skintumor_S23.txt	Spl_ECD4-Pymt-2_Skintumor_S23	ECD4	SPL	PYMT	SKINTUMOR	SKIN	234070	8644	36255	561	2609	0.899113
Spl_ECD4-Pymt-3_Lungtumor_S20.txt	Spl_ECD4-Pymt-3_Lungtumor_S20	ECD4	SPL	PYMT	LUNGTUMOR	LUNG	246208	15590	61034	504	3986	0.863985
Spl_ECD4-Pymt-3_Skintumor_S24.txt	Spl_ECD4-Pymt-3_Skintumor_S24	ECD4	SPL	PYMT	SKINTUMOR	SKIN	406347	16855	78618	697	3865	0.952781
Spl_ECD4-Pymt-4_Lungtumor_S21.txt	Spl_ECD4-Pymt-4_Lungtumor_S21	ECD4	SPL	PYMT	LUNGTUMOR	LUNG	497751	22558	93787	578	3516	0.890762
Spl_ECD4-Pymt-4_Skintumor_S25.txt	Spl_ECD4-Pymt-4_Skintumor_S25	ECD4	SPL	PYMT	SKINTUMOR	SKIN	554403	7740	38512	681	2485	0.94773
Spl_ECD4-Worm-1_Lung_old_S47.txt	Spl_ECD4-Worm-1_Lung_old_S47	ECD4	SPL	WORM	NONE	LUNG	261139	9418	71761	427	1728	0.832002
Spl_ECD4-Worm-2_Lung_old_S48.txt	Spl_ECD4-Worm-2_Lung_old_S48	ECD4	SPL	WORM	NONE	LUNG	400636	3595	18694	364	1840	0.757409
Spl_ECD4-Worm1_Lung_S44.txt	Spl_ECD4-Worm1_Lung_S44	ECD4	SPL	WORM	NONE	LUNG	144903	9993	53862	349	2061	0.796005
Spl_ECD4-Worm2_Lung_S45.txt	Spl_ECD4-Worm2_Lung_S45	ECD4	SPL	WORM	NONE	LUNG	343956	11331	68884	505	2367	0.882895
Spl_ECD4-Worm3_Lung_S46.txt	Spl_ECD4-Worm3_Lung_S46	ECD4	SPL	WORM	NONE	LUNG	443489	10838	85016	502	1922	0.872705
Spl_Etreg-B16-1_Lungtumor_S26.txt	Spl_Etreg-B16-1_Lungtumor_S26	ETREG	SPL	B16	LUNGTUMOR	LUNG	486867	7535	45729	409	1823	0.814523
Spl_Etreg-B16-1_Skintumor_S30.txt	Spl_Etreg-B16-1_Skintumor_S30	ETREG	SPL	B16	SKINTUMOR	SKIN	276654	7418	21557	515	3428	0.891424
Spl_Etreg-B16-2_Lungtumor_S27.txt	Spl_Etreg-B16-2_Lungtumor_S27	ETREG	SPL	B16	LUNGTUMOR	LUNG	119600	7953	43289	706	1869	0.948531
Spl_Etreg-B16-2_Skintumor_S31.txt	Spl_Etreg-B16-2_Skintumor_S31	ETREG	SPL	B16	SKINTUMOR	SKIN	267341	5217	24200	514	1801	0.897535
Spl_Etreg-B16-3_Lungtumor_S28.txt	Spl_Etreg-B16-3_Lungtumor_S28	ETREG	SPL	B16	LUNGTUMOR	LUNG	410001	8971	40243	550	3262	0.905521
Spl_Etreg-B16-3_Skintumor_S32.txt	Spl_Etreg-B16-3_Skintumor_S32	ETREG	SPL	B16	SKINTUMOR	SKIN	257112	10675	42077	654	3576	0.935783
Spl_Etreg-B16-4_Lungtumor_S29.txt	Spl_Etreg-B16-4_Lungtumor_S29	ETREG	SPL	B16	LUNGTUMOR	LUNG	235077	8708	42814	581	2909	0.903819
Spl_Etreg-Bleo1_Lung_old_S37.txt	Spl_Etreg-Bleo1_Lung_old_S37	ETREG	SPL	BLEO	NONE	LUNG	326540	6122	21266	614	3093	0.929377
Spl_Etreg-Bleo1_Lung_S33.txt	Spl_Etreg-Bleo1_Lung_S33	ETREG	SPL	BLEO	NONE	LUNG	212106	11345	52290	728	2859	0.963978
Spl_Etreg-Bleo2_Lung_old_S38.txt	Spl_Etreg-Bleo2_Lung_old_S38	ETREG	SPL	BLEO	NONE	LUNG	318660	8843	32348	691	3445	0.954682
Spl_Etreg-Bleo2_Lung_S34.txt	Spl_Etreg-Bleo2_Lung_S34	ETREG	SPL	BLEO	NONE	LUNG	232417	11248	46065	753	3434	0.966336
Spl_Etreg-Bleo3_Lung_old_S39.txt	Spl_Etreg-Bleo3_Lung_old_S39	ETREG	SPL	BLEO	NONE	LUNG	316069	9592	36393	707	3074	0.951961
Spl_Etreg-Bleo3_Lung_S35.txt	Spl_Etreg-Bleo3_Lung_S35	ETREG	SPL	BLEO	NONE	LUNG	225804	9616	42205	688	3155	0.954768
Spl_Etreg-Bleo4_Lung_S36.txt	Spl_Etreg-Bleo4_Lung_S36	ETREG	SPL	BLEO	NONE	LUNG	309104	8045	32404	727	3133	0.968528
Spl_Etreg-Ctrl1_S1.txt	Spl_Etreg-Ctrl1_S1	ETREG	SPL	CTRL	NONE	CONTROL	315103	13290	50738	682	4070	0.947691
Spl_Etreg-Ctrl1-old_S4.txt	Spl_Etreg-Ctrl1-old_S4	ETREG	SPL	CTRL	NONE	CONTROL	368867	9667	45031	704	3401	0.940674
Spl_Etreg-Ctrl2_S2.txt	Spl_Etreg-Ctrl2_S2	ETREG	SPL	CTRL	NONE	CONTROL	351764	11646	45113	644	3407	0.934649
Spl_Etreg-Ctrl2-old_S5.txt	Spl_Etreg-Ctrl2-old_S5	ETREG	SPL	CTRL	NONE	CONTROL	335374	11776	52546	731	4195	0.957705
Spl_Etreg-Ctrl3_S3.txt	Spl_Etreg-Ctrl3_S3	ETREG	SPL	CTRL	NONE	CONTROL	442556	11908	39586	651	5453	0.923286
Spl_Etreg-Ctrl3-old_S6.txt	Spl_Etreg-Ctrl3-old_S6	ETREG	SPL	CTRL	NONE	CONTROL	355679	7786	33401	832	2579	0.981475
Spl_Etreg-Flu1_Lung_S40.txt	Spl_Etreg-Flu1_Lung_S40	ETREG	SPL	FLU	NONE	LUNG	298938	7130	28443	591	3018	0.903279
Spl_Etreg-Flu2_Lung_S41.txt	Spl_Etreg-Flu2_Lung_S41	ETREG	SPL	FLU	NONE	LUNG	297879	7999	33933	684	2972	0.948057
Spl_ETreg-Flu3_Lung_S42.txt	Spl_ETreg-Flu3_Lung_S42	ETREG	SPL	FLU	NONE	LUNG	257923	5361	25804	715	2235	0.956613
Spl_Etreg-Flu4_Lung_S43.txt	Spl_Etreg-Flu4_Lung_S43	ETREG	SPL	FLU	NONE	LUNG	339664	6597	28578	543	3035	0.902775
Spl_Etreg-LLC-1_Lungtumor_S7.txt	Spl_Etreg-LLC-1_Lungtumor_S7	ETREG	SPL	LLC	LUNGTUMOR	LUNG	315204	5540	23644	653	2367	0.929333
Spl_Etreg-LLC-1-Lungtumor_old_S11.txt	Spl_Etreg-LLC-1-Lungtumor_old_S11	ETREG	SPL	LLC	LUNGTUMOR	LUNG	414268	5792	23456	613	2665	0.921458
Spl_Etreg-LLC-1-Skintumor_S14.txt	Spl_Etreg-LLC-1-Skintumor_S14	ETREG	SPL	LLC	SKINTUMOR	SKIN	242048	8378	55634	702	2252	0.961418
Spl_Etreg-LLC-2_Lungtumor_S8.txt	Spl_Etreg-LLC-2_Lungtumor_S8	ETREG	SPL	LLC	LUNGTUMOR	LUNG	394187	4967	22569	525	2272	0.892573
Spl_Etreg-LLC-2-Lungtumor_old_S12.txt	Spl_Etreg-LLC-2-Lungtumor_old_S12	ETREG	SPL	LLC	LUNGTUMOR	LUNG	371751	5894	24325	599	2415	0.930636
Spl_Etreg-LLC-2-Skintumor_S15.txt	Spl_Etreg-LLC-2-Skintumor_S15	ETREG	SPL	LLC	SKINTUMOR	SKIN	190412	8603	49818	675	2450	0.954456
Spl_Etreg-LLC-3_Lungtumor_S9.txt	Spl_Etreg-LLC-3_Lungtumor_S9	ETREG	SPL	LLC	LUNGTUMOR	LUNG	366529	12182	57700	582	2577	0.929121
Spl_Etreg-LLC-3-Lungtumor_old_S13.txt	Spl_Etreg-LLC-3-Lungtumor_old_S13	ETREG	SPL	LLC	LUNGTUMOR	LUNG	393639	7122	36097	640	2557	0.915212
Spl_Etreg-LLC-3-Skintumor_S16.txt	Spl_Etreg-LLC-3-Skintumor_S16	ETREG	SPL	LLC	SKINTUMOR	SKIN	351529	8574	46633	591	2118	0.918638
Spl_Etreg-LLC-4_Lungtumor_S10.txt	Spl_Etreg-LLC-4_Lungtumor_S10	ETREG	SPL	LLC	LUNGTUMOR	LUNG	312130	3997	13163	584	2585	0.925054
Spl_Etreg-LLC-4-Skintumor_S17.txt	Spl_Etreg-LLC-4-Skintumor_S17	ETREG	SPL	LLC	SKINTUMOR	SKIN	339186	4804	23199	645	2101	0.929576
Spl_Etreg-Pymt1_Lungtumor_S18.txt	Spl_Etreg-Pymt1_Lungtumor_S18	ETREG	SPL	PYMT	LUNGTUMOR	LUNG	237392	11153	51990	571	3240	0.91256
Spl_Etreg-Pymt1-Skintumor_S22.txt	Spl_Etreg-Pymt1-Skintumor_S22	ETREG	SPL	PYMT	SKINTUMOR	SKIN	324123	6557	43538	625	2219	0.907192
Spl_Etreg-Pymt2_Lungtumor_S19.txt	Spl_Etreg-Pymt2_Lungtumor_S19	ETREG	SPL	PYMT	LUNGTUMOR	LUNG	318344	7359	34020	535	2292	0.910136
Spl_Etreg-Pymt2-Skintumor_S23.txt	Spl_Etreg-Pymt2-Skintumor_S23	ETREG	SPL	PYMT	SKINTUMOR	SKIN	280498	7398	41944	612	2187	0.931928
Spl_Etreg-Pymt3_Lungtumor_S20.txt	Spl_Etreg-Pymt3_Lungtumor_S20	ETREG	SPL	PYMT	LUNGTUMOR	LUNG	308098	8275	26424	558	4097	0.914148
Spl_Etreg-Pymt3-Skintumor_S24.txt	Spl_Etreg-Pymt3-Skintumor_S24	ETREG	SPL	PYMT	SKINTUMOR	SKIN	164570	5921	34977	696	1864	0.943405
Spl_Etreg-Pymt4_Lungtumor_S21.txt	Spl_Etreg-Pymt4_Lungtumor_S21	ETREG	SPL	PYMT	LUNGTUMOR	LUNG	325827	12294	48314	536	3384	0.901765
Spl_Etreg-Pymt4-Skintumor_S25.txt	Spl_Etreg-Pymt4-Skintumor_S25	ETREG	SPL	PYMT	SKINTUMOR	SKIN	308081	7252	43413	672	2262	0.936332
Spl_Etreg-Worm-1-Lung_old_S47.txt	Spl_Etreg-Worm-1-Lung_old_S47	ETREG	SPL	WORM	NONE	LUNG	227809	10359	50659	516	3361	0.881135
Spl_Etreg-Worm-2-Lung_old_S48.txt	Spl_Etreg-Worm-2-Lung_old_S48	ETREG	SPL	WORM	NONE	LUNG	324419	12494	49353	741	3020	0.969948
Spl_Etreg-Worm1-Lung_S44.txt	Spl_Etreg-Worm1-Lung_S44	ETREG	SPL	WORM	NONE	LUNG	332035	6754	22757	753	3312	0.972625
Spl_Etreg-Worm2-Lung_S45.txt	Spl_Etreg-Worm2-Lung_S45	ETREG	SPL	WORM	NONE	LUNG	194647	8465	34273	747	3056	0.96686
Spl_Etreg-Worm3-Lung_S46.txt	Spl_Etreg-Worm3-Lung_S46	ETREG	SPL	WORM	NONE	LUNG	316789	9296	41348	755	2723	0.97357
Thymus_spCD4-Ctrl1_S1.txt	Thymus_spCD4-Ctrl1_S1	SPCD4	THYMUS	CTRL	NONE	CONTROL	527353	32774	76315	894	7574	0.990163
Thymus_spCD4-Ctrl1_S4_old.txt	Thymus_spCD4-Ctrl1_S4_old	SPCD4	THYMUS	CTRL	NONE	CONTROL	690952	2664	4858	782	3752	0.975467
Thymus_spCD4-Ctrl2_S2.txt	Thymus_spCD4-Ctrl2_S2	SPCD4	THYMUS	CTRL	NONE	CONTROL	613400	36768	89362	902	7849	0.992187
Thymus_spCD4-Ctrl2_S5_old.txt	Thymus_spCD4-Ctrl2_S5_old	SPCD4	THYMUS	CTRL	NONE	CONTROL	1161784	1545	3035	704	2150	0.968004
Thymus_spCD4-Ctrl3_S3.txt	Thymus_spCD4-Ctrl3_S3	SPCD4	THYMUS	CTRL	NONE	CONTROL	679967	27530	67788	898	8134	0.990306
Thymus_spCD4-Ctrl3_S6_old.txt	Thymus_spCD4-Ctrl3_S6_old	SPCD4	THYMUS	CTRL	NONE	CONTROL	466396	2067	3553	757	4042	0.966956
Thymus_spCD4-Lung_Bleo1_S7.txt	Thymus_spCD4-Lung_Bleo1_S7	SPCD4	THYMUS	BLEO	NONE	LUNG	687363	38310	76344	909	8753	0.991106
Thymus_spCD4-Lung_Bleo2_S8.txt	Thymus_spCD4-Lung_Bleo2_S8	SPCD4	THYMUS	BLEO	NONE	LUNG	570757	32347	65934	875	9276	0.985586
Thymus_spCD4-Lung_Bleo3_S9.txt	Thymus_spCD4-Lung_Bleo3_S9	SPCD4	THYMUS	BLEO	NONE	LUNG	700903	34653	72346	876	6951	0.986802
Thymus_spCD4-Lung_Bleo4_S10.txt	Thymus_spCD4-Lung_Bleo4_S10	SPCD4	THYMUS	BLEO	NONE	LUNG	703465	37407	84427	877	7796	0.986803
Thymus_spCD4-Lung_Worm1_S15.txt	Thymus_spCD4-Lung_Worm1_S15	SPCD4	THYMUS	WORM	NONE	LUNG	608632	26435	73253	819	4497	0.983468
Thymus_spCD4-Lung_Worm2_S16.txt	Thymus_spCD4-Lung_Worm2_S16	SPCD4	THYMUS	WORM	NONE	LUNG	570551	15779	38982	853	5643	0.985712
Thymus_spCD4-Lung_Worm3_S17.txt	Thymus_spCD4-Lung_Worm3_S17	SPCD4	THYMUS	WORM	NONE	LUNG	562205	20753	64136	836	5417	0.984593
Thymus_spCD4-Lungtumor_B16-1_S26.txt	Thymus_spCD4-Lungtumor_B16-1_S26	SPCD4	THYMUS	B16	LUNGTUMOR	LUNG	705555	26579	55221	868	5777	0.986373
Thymus_spCD4-Lungtumor_B16-2_S27.txt	Thymus_spCD4-Lungtumor_B16-2_S27	SPCD4	THYMUS	B16	LUNGTUMOR	LUNG	633266	29012	60404	874	7478	0.985895
Thymus_spCD4-Lungtumor_B16-3_S28.txt	Thymus_spCD4-Lungtumor_B16-3_S28	SPCD4	THYMUS	B16	LUNGTUMOR	LUNG	570236	33434	65868	917	13111	0.99124
Thymus_spCD4-Lungtumor_B16-4_S29.txt	Thymus_spCD4-Lungtumor_B16-4_S29	SPCD4	THYMUS	B16	LUNGTUMOR	LUNG	652170	1243	2214	701	2094	0.96661
Thymus_spCD4-Lungtumor_LLC1_S22.txt	Thymus_spCD4-Lungtumor_LLC1_S22	SPCD4	THYMUS	LLC	LUNGTUMOR	LUNG	300776	20519	35999	906	7416	0.992288
Thymus_spCD4-Lungtumor_LLC2_S23.txt	Thymus_spCD4-Lungtumor_LLC2_S23	SPCD4	THYMUS	LLC	LUNGTUMOR	LUNG	88062	3905	4830	908	10775	0.988653
Thymus_spCD4-Lungtumor_LLC3_S24.txt	Thymus_spCD4-Lungtumor_LLC3_S24	SPCD4	THYMUS	LLC	LUNGTUMOR	LUNG	477284	33623	79833	881	6858	0.989772
Thymus_spCD4-Lungtumor_LLC4_S25.txt	Thymus_spCD4-Lungtumor_LLC4_S25	SPCD4	THYMUS	LLC	LUNGTUMOR	LUNG	458968	28495	56649	899	8378	0.988794
Thymus_spCD4-Lungtumor_Pymt1_S18.txt	Thymus_spCD4-Lungtumor_Pymt1_S18	SPCD4	THYMUS	PYMT	LUNGTUMOR	LUNG	429673	24259	41170	902	10352	0.98821
Thymus_spCD4-Lungtumor_Pymt2_S19.txt	Thymus_spCD4-Lungtumor_Pymt2_S19	SPCD4	THYMUS	PYMT	LUNGTUMOR	LUNG	682477	38237	78687	896	8771	0.990359
Thymus_spCD4-Lungtumor_Pymt3_S20.txt	Thymus_spCD4-Lungtumor_Pymt3_S20	SPCD4	THYMUS	PYMT	LUNGTUMOR	LUNG	659673	35964	72492	893	11207	0.988003
Thymus_spCD4-Lungtumor_Pymt4_S21.txt	Thymus_spCD4-Lungtumor_Pymt4_S21	SPCD4	THYMUS	PYMT	LUNGTUMOR	LUNG	679486	33371	71433	890	7919	0.989287
Thymus_spCD4-skintumor_B16-1_S37.txt	Thymus_spCD4-skintumor_B16-1_S37	SPCD4	THYMUS	B16	SKINTUMOR	SKIN	490154	30455	66297	887	7328	0.988165
Thymus_spCD4-skintumor_B16-2_S38.txt	Thymus_spCD4-skintumor_B16-2_S38	SPCD4	THYMUS	B16	SKINTUMOR	SKIN	572757	29449	64873	896	8916	0.990695
Thymus_spCD4-skintumor_LLC1_S30.txt	Thymus_spCD4-skintumor_LLC1_S30	SPCD4	THYMUS	LLC	SKINTUMOR	SKIN	472365	22665	44046	882	9675	0.987142
Thymus_spCD4-skintumor_LLC2_S31.txt	Thymus_spCD4-skintumor_LLC2_S31	SPCD4	THYMUS	LLC	SKINTUMOR	SKIN	299474	14169	26516	875	7583	0.987695
Thymus_spCD4-skintumor_LLC3_S32.txt	Thymus_spCD4-skintumor_LLC3_S32	SPCD4	THYMUS	LLC	SKINTUMOR	SKIN	456850	6876	13657	838	4377	0.985939
Thymus_spCD4-skintumor_LLC4_S33.txt	Thymus_spCD4-skintumor_LLC4_S33	SPCD4	THYMUS	LLC	SKINTUMOR	SKIN	296856	24211	57462	873	7395	0.987287
Thymus_spCD4-Skintumor_Pymt1_S34.txt	Thymus_spCD4-Skintumor_Pymt1_S34	SPCD4	THYMUS	PYMT	SKINTUMOR	SKIN	178237	1565	2328	776	3093	0.975735
Thymus_spCD4-Skintumor_Pymt2_S35.txt	Thymus_spCD4-Skintumor_Pymt2_S35	SPCD4	THYMUS	PYMT	SKINTUMOR	SKIN	743111	34172	69506	861	9391	0.982791
Thymus_spCD4-Skintumor_Pymt3_S36.txt	Thymus_spCD4-Skintumor_Pymt3_S36	SPCD4	THYMUS	PYMT	SKINTUMOR	SKIN	474089	29672	63194	886	8203	0.988028
Thymus_spNTREG_Ctrl1_S1.txt	Thymus_spNTREG_Ctrl1_S1	SPNTREG	THYMUS	CTRL	NONE	CONTROL	528180	4004	7365	828	4694	0.98068
Thymus_spNTREG_Ctrl1_S4_old.txt	Thymus_spNTREG_Ctrl1_S4_old	SPNTREG	THYMUS	CTRL	NONE	CONTROL	676968	2367	4630	754	3062	0.971367
Thymus_spNTREG_Ctrl2_S2.txt	Thymus_spNTREG_Ctrl2_S2	SPNTREG	THYMUS	CTRL	NONE	CONTROL	729479	1985	3987	724	2402	0.973582
Thymus_spNTREG_Ctrl2_S5_old.txt	Thymus_spNTREG_Ctrl2_S5_old	SPNTREG	THYMUS	CTRL	NONE	CONTROL	867215	2694	5381	792	3699	0.97833
Thymus_spNTREG_Ctrl3_S3.txt	Thymus_spNTREG_Ctrl3_S3	SPNTREG	THYMUS	CTRL	NONE	CONTROL	603490	1048	1871	680	1682	0.972037
Thymus_spNTREG_Ctrl3_S6_old.txt	Thymus_spNTREG_Ctrl3_S6_old	SPNTREG	THYMUS	CTRL	NONE	CONTROL	623403	2594	4862	764	3486	0.971431
Thymus_spNTREG-Lung-Bleo1_old_S11.txt	Thymus_spNTREG-Lung-Bleo1_old_S11	SPNTREG	THYMUS	BLEO	NONE	LUNG	583673	2563	5111	769	3272	0.973029
Thymus_spNTREG-Lung-Bleo1_S7.txt	Thymus_spNTREG-Lung-Bleo1_S7	SPNTREG	THYMUS	BLEO	NONE	LUNG	950563	535	1113	504	813	0.959008
Thymus_spNTREG-Lung-Bleo2_old_S12.txt	Thymus_spNTREG-Lung-Bleo2_old_S12	SPNTREG	THYMUS	BLEO	NONE	LUNG	599428	2603	5281	764	3410	0.972747
Thymus_spNTREG-Lung-Bleo2_S8.txt	Thymus_spNTREG-Lung-Bleo2_S8	SPNTREG	THYMUS	BLEO	NONE	LUNG	607057	2131	4082	723	3049	0.959624
Thymus_spNTREG-Lung-Bleo3_old_S13.txt	Thymus_spNTREG-Lung-Bleo3_old_S13	SPNTREG	THYMUS	BLEO	NONE	LUNG	574249	2180	4189	736	2551	0.972759
Thymus_spNTREG-Lung-Bleo3_S9.txt	Thymus_spNTREG-Lung-Bleo3_S9	SPNTREG	THYMUS	BLEO	NONE	LUNG	701470	1424	2639	701	2612	0.966522
Thymus_spNTREG-Lung-Bleo4_S10.txt	Thymus_spNTREG-Lung-Bleo4_S10	SPNTREG	THYMUS	BLEO	NONE	LUNG	745781	493	1149	457	707	0.947632
Thymus_spNTREG-Lung-Worm-1_old_S23.txt	Thymus_spNTREG-Lung-Worm-1_old_S23	SPNTREG	THYMUS	WORM	NONE	LUNG	649983	393	902	393	631	0.956296
Thymus_spNTREG-Lung-Worm-1_S20.txt	Thymus_spNTREG-Lung-Worm-1_S20	SPNTREG	THYMUS	WORM	NONE	LUNG	532443	938	2039	607	1399	0.95573
Thymus_spNTREG-Lung-Worm-2_old_S24.txt	Thymus_spNTREG-Lung-Worm-2_old_S24	SPNTREG	THYMUS	WORM	NONE	LUNG	730260	549	1202	494	814	0.950762
Thymus_spNTREG-Lung-Worm-2_S21.txt	Thymus_spNTREG-Lung-Worm-2_S21	SPNTREG	THYMUS	WORM	NONE	LUNG	692264	454	1087	438	649	0.94234
Thymus_spNTREG-Lung-Worm-3_S22.txt	Thymus_spNTREG-Lung-Worm-3_S22	SPNTREG	THYMUS	WORM	NONE	LUNG	595820	418	928	418	688	0.950312
Thymus_spNTREG-Lungtumor_B16-1_S33.txt	Thymus_spNTREG-Lungtumor_B16-1_S33	SPNTREG	THYMUS	B16	LUNGTUMOR	LUNG	585395	1745	3370	726	2517	0.967308
Thymus_spNTREG-Lungtumor_B16-2_S34.txt	Thymus_spNTREG-Lungtumor_B16-2_S34	SPNTREG	THYMUS	B16	LUNGTUMOR	LUNG	561568	1259	2502	667	1673	0.96463
Thymus_spNTREG-Lungtumor_B16-3_S35.txt	Thymus_spNTREG-Lungtumor_B16-3_S35	SPNTREG	THYMUS	B16	LUNGTUMOR	LUNG	802439	1246	2330	667	1806	0.96339
Thymus_spNTREG-Lungtumor_B16-4_S36.txt	Thymus_spNTREG-Lungtumor_B16-4_S36	SPNTREG	THYMUS	B16	LUNGTUMOR	LUNG	530441	33269	73812	868	6793	0.985204
Thymus_spNTREG-Lungtumor_LLC-1_S29.txt	Thymus_spNTREG-Lungtumor_LLC-1_S29	SPNTREG	THYMUS	LLC	LUNGTUMOR	LUNG	645174	2484	5001	728	2686	0.968402
Thymus_spNTREG-Lungtumor_LLC-2_S30.txt	Thymus_spNTREG-Lungtumor_LLC-2_S30	SPNTREG	THYMUS	LLC	LUNGTUMOR	LUNG	583387	2268	4531	716	2813	0.962302
Thymus_spNTREG-Lungtumor_LLC-3_S31.txt	Thymus_spNTREG-Lungtumor_LLC-3_S31	SPNTREG	THYMUS	LLC	LUNGTUMOR	LUNG	586701	2787	5927	729	3727	0.960721
Thymus_spNTREG-Lungtumor_LLC-4_S32.txt	Thymus_spNTREG-Lungtumor_LLC-4_S32	SPNTREG	THYMUS	LLC	LUNGTUMOR	LUNG	604641	1847	3549	728	2435	0.972439
Thymus_spNTREG-Lungtumor_Pymt-1_S25.txt	Thymus_spNTREG-Lungtumor_Pymt-1_S25	SPNTREG	THYMUS	PYMT	LUNGTUMOR	LUNG	686440	1795	3338	733	2727	0.971026
Thymus_spNTREG-Lungtumor_Pymt-2_S26.txt	Thymus_spNTREG-Lungtumor_Pymt-2_S26	SPNTREG	THYMUS	PYMT	LUNGTUMOR	LUNG	443472	2778	5978	703	2942	0.952132
Thymus_spNTREG-Lungtumor_Pymt-3_S27.txt	Thymus_spNTREG-Lungtumor_Pymt-3_S27	SPNTREG	THYMUS	PYMT	LUNGTUMOR	LUNG	621644	2112	4241	740	3130	0.964809
Thymus_spNTREG-Lungtumor_Pymt-4_S28.txt	Thymus_spNTREG-Lungtumor_Pymt-4_S28	SPNTREG	THYMUS	PYMT	LUNGTUMOR	LUNG	659283	2018	4185	718	3190	0.959947
Thymus_spNTREG-Skintumor_B16-1_S44.txt	Thymus_spNTREG-Skintumor_B16-1_S44	SPNTREG	THYMUS	B16	SKINTUMOR	SKIN	673107	1410	2537	703	2172	0.968282
Thymus_spNTREG-Skintumor_B16-2_S45.txt	Thymus_spNTREG-Skintumor_B16-2_S45	SPNTREG	THYMUS	B16	SKINTUMOR	SKIN	829559	1228	2319	693	1942	0.962133
Thymus_spNTREG-Skintumor_LLC-1_S37.txt	Thymus_spNTREG-Skintumor_LLC-1_S37	SPNTREG	THYMUS	LLC	SKINTUMOR	SKIN	709670	1553	2822	716	2157	0.972874
Thymus_spNTREG-Skintumor_LLC-2_S38.txt	Thymus_spNTREG-Skintumor_LLC-2_S38	SPNTREG	THYMUS	LLC	SKINTUMOR	SKIN	671295	784	1497	610	1302	0.962507
Thymus_spNTREG-Skintumor_LLC-3_S39.txt	Thymus_spNTREG-Skintumor_LLC-3_S39	SPNTREG	THYMUS	LLC	SKINTUMOR	SKIN	771620	1179	2254	692	1910	0.968277
Thymus_spNTREG-Skintumor_LLC-4_S40.txt	Thymus_spNTREG-Skintumor_LLC-4_S40	SPNTREG	THYMUS	LLC	SKINTUMOR	SKIN	145721	205	339	excluded	excluded	excluded
Thymus_spNTREG-Skintumor_Pymt-1_S41.txt	Thymus_spNTREG-Skintumor_Pymt-1_S41	SPNTREG	THYMUS	PYMT	SKINTUMOR	SKIN	448163	30597	67516	882	6795	0.989386
Thymus_spNTREG-Skintumor_Pymt-2_S42.txt	Thymus_spNTREG-Skintumor_Pymt-2_S42	SPNTREG	THYMUS	PYMT	SKINTUMOR	SKIN	613204	2652	5104	787	3820	0.974708
Thymus_spNTREG-Skintumor_Pymt-3_S43.txt	Thymus_spNTREG-Skintumor_Pymt-3_S43	SPNTREG	THYMUS	PYMT	SKINTUMOR	SKIN	618883	3258	6240	806	4291	0.978234
